# Supplementary material for: Barriers and facilitators to orthopaedic surgeons’ uptake of decision aids for total knee arthroplasty: a qualitative study
Source: PubMed Central journal article supplement — BMJ Open. 2017 Nov 12;7(11):e018614. doi: 10.1136/bmjopen-2017-018614 (PMC5695436; doi:10.1136/bmjopen-2017-018614), 2017-11-12
Supplement: bmjopen-2017-018614.draft_revisions.pdf [file bmjopen-2017-018614.draft_revisions.pdf]

# BMJ Open

BMJ Open is committed to open peer review. As part of this commitment we make the peer review history of every article we publish publicly available.

When an article is published we post the peer reviewers' comments and the authors' responses online. We also post the versions of the paper that were used during peer review. These are the versions that the peer review comments apply to.

The versions of the paper that follow are the versions that were submitted during the peer review process. They are not the versions of record or the final published versions. They should not be cited or distributed as the published version of this manuscript.

BMJ Open is an open access journal and the full, final, typeset and author-corrected version of record of the manuscript is available on our site with no access controls, subscription charges or pay-per-view fees (<http://bmjopen.bmj.com>).

If you have any questions on BMJ Open's open peer review process please email [editorial.bmjopen@bmj.com](mailto:editorial.bmjopen@bmj.com)

# BMJ Open

## Barriers and facilitators to Orthopaedic Surgeons' uptake of decision aids for Total Knee Arthroplasty: A qualitative study

|                                 |                                                                                                                                                                                                                                                                                                                                                                                                                                                                                                                                                                                                                                                |
|---------------------------------|------------------------------------------------------------------------------------------------------------------------------------------------------------------------------------------------------------------------------------------------------------------------------------------------------------------------------------------------------------------------------------------------------------------------------------------------------------------------------------------------------------------------------------------------------------------------------------------------------------------------------------------------|
| Journal:                        | <i>BMJ Open</i>                                                                                                                                                                                                                                                                                                                                                                                                                                                                                                                                                                                                                                |
| Manuscript ID                   | bmjopen-2017-018614                                                                                                                                                                                                                                                                                                                                                                                                                                                                                                                                                                                                                            |
| Article Type:                   | Research                                                                                                                                                                                                                                                                                                                                                                                                                                                                                                                                                                                                                                       |
| Date Submitted by the Author:   | 10-Jul-2017                                                                                                                                                                                                                                                                                                                                                                                                                                                                                                                                                                                                                                    |
| Complete List of Authors:       | Bunzli, Samantha; The University of Melbourne, Department of Surgery, St Vincent's Hospital Melbourne<br>Nelson, Elizabeth ; St Vincent's Hospital, Melbourne, Department of Orthopaedics<br>Scott, Anthony; The University of Melbourne, Melbourne Institute of Applied Economic and Social Research<br>French, Simon; Queen's University, School of Rehabilitation Therapy; Monash University, School of Public Health and Preventive Medicine<br>Choong, Peter; University of Melbourne, Surgery; St Vincent's Hospital, Orthopaedics<br>Dowsey, Michelle; University of Melbourne, Department of Surgery, St Vincent's Hospital, Melbourne |
| <b>Primary Subject Heading</b>: | Evidence based practice                                                                                                                                                                                                                                                                                                                                                                                                                                                                                                                                                                                                                        |
| Secondary Subject Heading:      | Qualitative research                                                                                                                                                                                                                                                                                                                                                                                                                                                                                                                                                                                                                           |
| Keywords:                       | Knee < ORTHOPAEDIC & TRAUMA SURGERY, QUALITATIVE RESEARCH, Total Knee Arthroplasty, Decision aids, Implementation                                                                                                                                                                                                                                                                                                                                                                                                                                                                                                                              |
|                                 |                                                                                                                                                                                                                                                                                                                                                                                                                                                                                                                                                                                                                                                |

SCHOLARONE™  
Manuscripts

1  
2  
3 **1 Barriers and facilitators to Orthopaedic Surgeons' uptake of decision aids for Total**  
4 **2 Knee Arthroplasty: A qualitative study**  
5  
6 **3**

7 4 \* Samantha Bunzli. The University of Melbourne, Department of Surgery, St. Vincent's  
8 Hospital, Melbourne. Level 2, Clinical Sciences Building, 29 Regent street, Fitzroy 3065,  
9 Victoria, Australia. Email: sbunzli@unimelb.edu.au  
10 6

11 7  
12 8 Elizabeth Nelson. Department of Orthopaedics, St Vincent's Hospital. 41 Victoria  
13 Parade, Fitzroy, Melbourne 3065 Australia. Email: elizabeth.nelson@svha.org.au  
14 9

15 10  
16 11 Anthony Scott. Melbourne Institute of Applied Economic and Social Research, The  
17 University of Melbourne. Level 5, Faculty of Business and Economics Building, 111  
18 Barry Street, Melbourne 3010 Victoria, Australia. Email: a.scott@unimelb.edu.au  
19 14

20 15 Simon French. School of Rehabilitation Therapy, Faculty of Health Sciences, Louise D.  
21 Acton Building, Room 222. Queen's University, 99 University Ave, Kingston, ON K7L  
22 3N6. Canada. Email: simon.french@queensu.ca  
23 17

24 18  
25 19 Peter Choong. The University of Melbourne, Department of Surgery, St. Vincent's  
26 Hospital, Melbourne. Level 2, Clinical Sciences Building, 29 Regent street, Fitzroy 3065,  
27 Victoria, Australia. Email: pchoong@unimelb.edu.au  
28 21

29 22  
30 23 Michelle Dowsey. The University of Melbourne, Department of Surgery, St. Vincent's  
31 Hospital, Melbourne. Level 2, Clinical Sciences Building, 29 Regent street, Fitzroy 3065,  
32 Victoria, Australia. Email: mmdowsey@unimelb.edu.au  
33 25

34 26  
35 27  
36 28 \* Corresponding author  
37

38 29  
39  
40  
41  
42  
43  
44  
45  
46  
47  
48  
49  
50  
51  
52  
53  
54  
55  
56  
57  
58  
59  
60

1  
2  
3 **Abstract**  
4

5  
6 *Objectives:* The demand for Total Knee Arthroplasty (TKA) will soon outstrip supply. It  
7  
8 is imperative to reserve TKA for those most likely to benefit. Decision aids can help  
9  
10 surgeons select appropriate candidates for surgery, but their uptake has been low. The  
11  
12 aim of this study was to explore the barriers and facilitators to decision aid uptake among  
13  
14 Orthopaedic Surgeons. *Design:* A qualitative study involving face-to-face interviews.  
15  
16 Questions were constructed on the Theoretical Domains Framework to systematically  
17  
18 explore barriers and facilitators. *Setting:* One tertiary hospital in Australia. *Participants:*  
19  
20 Twenty Orthopaedic Surgeons performing TKA. *Outcome measures:* Beliefs underlying  
21  
22 similar interview responses were identified and grouped together as themes describing  
23  
24 relevant barriers and facilitators to uptake of decision aids. *Results:* While prioritising  
25  
26 their clinical acumen, surgeons believed a decision aid could enhance communication and  
27  
28 patient informed consent. Barriers identified included the perception that one's patient  
29  
30 outcomes were already optimal; a perceived lack of non-operative alternatives for the  
31  
32 management of end-stage osteoarthritis; concerns about mandatory cut-offs for patient-  
33  
34 centred care, and concerns about the medico-legal implications of using a decision aid.  
35  
36 *Conclusions:* Multifaceted implementation interventions are required to ensure that  
37  
38 Orthopaedic Surgeons are ready, willing and able to use a TKA decision aid.  
39  
40 Audit/feedback to address current decision-making biases such as overconfidence may  
41  
42 enhance readiness to uptake. Policy changes and/or incentives may enhance willingness  
43  
44 to uptake. Finally, the design/implementation of effective non-operative treatments may  
45  
46 enhance ability to uptake by ensuring that surgeons have the resources they need to carry  
47  
48 out decisions.  
49  
50  
51  
52  
53  
54  
55  
56  
57  
58  
59  
60

1  
2  
3 53  
4  
56 54 **Strengths and limitations of the study**7  
8 55 • Very few qualitative studies involving Orthopaedic Surgeons have been published  
9  
10 56 in the literature.11  
12 57 • This study took place in one of the largest arthroplasty clinics in Australia. All  
13  
14 58 twenty surgeons performing TKA in this hospital participated in a one-to-one  
15  
16 59 interview.17  
18  
19  
20 60 • A theoretical framework was used to systematically explore the barriers and  
21  
22 61 facilitators to uptake of a decision aid by Orthopaedic Surgeons.23  
24  
25 62 • Consistent findings are documented between this single site study and international  
26  
27 63 surveys of surgeon' attitudes.28  
29  
30 64 • Beliefs and attitudes are distinct from actual behaviour, and therefore the themes  
31  
32 65 elicited in this study do not provide evidence of the actual influences on uptake of a  
33  
34 66 decision aid.35  
36  
37 67  
38  
39  
40  
41  
42  
43  
44  
45  
46  
47  
48  
49  
50  
51  
52  
53  
54  
55  
56  
57  
58  
59  
60

1  
2  
3 **68 Background**  
4

5  
6 69 Up to one quarter of Total Knee Arthroplasties (TKA) are performed on inappropriate  
7  
8 70 candidates according to evidence-based criteria<sup>1</sup> and a similar proportion experience  
9  
10 71 minimal clinical benefit from surgery.<sup>2</sup> To reduce expenditure, optimize the utilization of  
11  
12 72 resources, and avoid unnecessary pain and suffering, it is important to reserve TKA for  
13  
14 73 those who will derive a clinically meaningful improvement in pain and function.  
15  
16  
17  
18  
19

20 75 At present, indications for TKA vary widely.<sup>3 4</sup> While the degree osteoarthritis (OA)  
21  
22 76 severity, pain severity and the impact of pain, are key indicators for TKA, surgeons'  
23  
24 77 consideration of other evidence-based indicators such as psychosocial factors remains  
25  
26 78 varied.<sup>5</sup> Observations of orthopaedic consultations suggest that other 'unstated factors'  
27  
28 79 may also influence clinical judgments such as the surgeons' beliefs in their own ability to  
29  
30 80 conduct surgery and their 'instincts' about the patients ability to cope with pain.<sup>6</sup>  
31  
32  
33  
34  
35

36 82 In recent years there has been a move towards a model of shared decision-making in  
37  
38 83 Orthopaedics as part of informed consent.<sup>7 8</sup> This model implies that surgeons have a duty  
39  
40 84 to inform patients about the benefits and harms of TKA and the likelihood of their  
41  
42 85 occurrence, supporting them to arrive at an informed, shared decision. Evidence suggests  
43  
44 86 that there is often a lack of time during the clinical encounter for patients to consider or  
45  
46 87 discuss all available treatment options and arrive at a decision congruent with their own  
47  
48 88 preferences.<sup>9</sup>  
49  
50  
51  
52

53 89  
54  
55  
56  
57  
58  
59  
60

1  
2  
3 90 To help address variations in clinical judgments and promote shared decision-making,  
4  
5 91 decision aids may be useful.<sup>10 11</sup> Decision aids can be designed to estimate important,  
6  
7  
8 92 patient-specific risks of responding to surgery, based on independent prognostic  
9  
10 93 correlates of post-TKA response such as body mass index, degree of OA severity, pre-  
11  
12 94 operative pain, function and mental health.<sup>12</sup> Similar aids have been found to predict  
13  
14 95 outcomes in other areas of medicine with superior accuracy to clinical judgments alone.<sup>13</sup>  
15  
16  
17 96 <sup>14</sup> Decision aids have improved patient knowledge and confidence in decisions,<sup>15</sup> and  
18  
19 97 have even been found to reduce the rate of surgical procedures.<sup>16</sup>  
20  
21  
22 98  
23  
24 99 Orthopaedic Surgeons recognize the need for an aid to support their decision making for  
25  
26 100 TKA and optimize communication with patients.<sup>5 17</sup> However, the uptake of decision aids  
27  
28 101 amongst surgeons has been low.<sup>8</sup> A number of factors can influence uptake of a decision  
29  
30 102 aid, and the success of implementation efforts depends on the careful assessment of the  
31  
32 103 barriers to, and facilitators of, uptake.<sup>18</sup> The implementation literature advocates the use  
33  
34 104 of theory to ensure the systematic identification of such factors and inform the design of  
35  
36 105 interventions to address them.<sup>19</sup> Using theory not only increases the likelihood of  
37  
38 106 behavior change,<sup>20</sup> but also provides a basis for better understanding the processes  
39  
40 107 underpinning behavior change.<sup>21</sup> To date, studies of decision-making amongst  
41  
42 108 Orthopaedic Surgeons have been few and atheoretical<sup>5 6 22</sup> and the barriers and facilitators  
43  
44 109 of uptake of decision aids for TKA have not been rigorously explored.<sup>8 17</sup>  
45  
46  
47  
48  
49  
50  
51  
52

110

111 **Methods**

112

1  
2  
3 113 **Aim and Design:**  
4  
5

6 114  
7

8 115 The aim of this theoretically-informed qualitative study was to explore the barriers and  
9  
10 116 facilitators to uptake of a TKA decision aid through structured one-to-one interviews with  
11  
12 117 Orthopaedic Surgeons.  
13

14  
15 118

16  
17 119 **Participants:**  
18

19  
20 120

21  
22 121 All Orthopaedic Surgeons and Registrars performing TKA at one tertiary teaching  
23  
24 122 hospital in Australia were eligible. Eligible candidates received the study details via  
25  
26 123 email from an institutional administration officer, and were invited to contact the  
27  
28 124 researchers to arrange an interview at a time and place suitable to them.  
29  
30

31  
32 125

33  
34 126 **Data collection:**  
35

36 127  
37

38 128 The Theoretical Domains Framework (TDF)<sup>23</sup> was selected as a comprehensive and  
39  
40 129 validated framework for determining barriers and facilitators related to the  
41  
42 130 implementation of best practice and clinicians' behavior change. The TDF was developed  
43  
44 131 by implementation scientists to synthesise existing behavior change theories into a single  
45  
46 132 framework. A six-stage consensus approach resulted in the identification of 12 theoretical  
47  
48 133 'domains' describing possible mediators of behavior change.<sup>23</sup> A subsequent validation  
49  
50 134 study<sup>21</sup> revised the original TDF to 14 domains: Knowledge; Skills; Social/professional  
51  
52  
53 135 role and identity; Beliefs about capabilities; Optimism; Beliefs about consequences;  
54  
55  
56  
57  
58  
59  
60



1  
2  
3 136 Reinforcement; Intentions; Goals; Memory, attention and decision processes;  
4  
5  
6 137 Environmental context and resources, Social influences; Emotions; and Behavioural  
7  
8 138 regulation. The revised TDF, used in this study, has explained implementation problems  
9  
10 139 and informed the development of theory-informed behavior change interventions.<sup>24-26</sup>  
11

12  
13 140

14  
15 141 Interview questions were developed for each domain of the TDF with the advice of  
16  
17 142 content experts in the TDF (SF), orthopaedic surgery (MD) and decision-making  
18  
19 143 processes (AS), and in consultation with the literature.<sup>27</sup> In the first part of the interview,  
20  
21 144 questions aimed to elicit current decision-making processes and biases. In the second  
22  
23 145 part, questions aimed to identify beliefs and attitudes towards decision aids and factors  
24  
25 146 that may influence decisions to use one. Table 1 presents the interview schedule.  
26  
27

28  
29 147

30  
31  
32 148 [Insert Table 1]  
33

34  
35 149

36  
37 150 The interviewer (SB), a female post-doctoral researcher with methodological expertise in  
38  
39 151 qualitative research, had no previous relationship with the participants and no affiliation  
40  
41 152 with the hospital. Data saturation was considered complete when the beliefs and attitudes  
42  
43 153 of all 20 surgeons working in this setting had been elicited. Face-to-face interviews were  
44  
45 154 conducted with 18 participants in a private office; phone interviews were conducted with  
46  
47 155 two participants. Interviews lasted 20-30 minutes. Nineteen interviews were audio  
48  
49 156 recorded and transcribed verbatim. One participant did not wish the interview to be  
50  
51 157 recorded, therefore hand-written notes were made during the interview. Participant  
52  
53 158 anonymity was ensured at all times. All transcripts were de-identified prior to data  
54  
55  
56  
57  
58  
59  
60

1  
2  
3 159 analysis. All participants had the opportunity to review the study findings during a  
4  
5  
6 160 presentation at a scheduled surgical meeting. There was consensus agreement with the  
7  
8 161 researchers' interpretations and no adjustments were made to the study themes.  
9

10  
11 162

12  
13 **Analysis:**

14  
15 164

16  
17 165 Adopting an implementation approach,<sup>25</sup> three stages of data analysis were conducted  
18  
19  
20 166 involving deductive and inductive coding. In the first stage (deductive coding), two  
21  
22 167 researchers (SB, EN) independently coded interview transcripts into the 14 TDF  
23  
24 168 domains. Definitions for each domain were derived from the literature<sup>18</sup> and adapted to  
25  
26  
27 169 the study context. Each response or utterance could only be classified into one domain.  
28  
29 170 Pilot coding was performed in which the two researchers independently applied the  
30  
31  
32 171 coding framework to two transcripts. Inter-coder comparisons resulted in refinement of  
33  
34 172 domain definitions (see Additional file 1). This process was conducted three times, until  
35  
36  
37 173 the two researchers were confident that all relevant raw data could be clearly classified  
38  
39 174 into one domain using the refined coding framework.

40  
41 175

42  
43 176 The two researchers then independently applied the refined coding framework to all 20  
44  
45  
46 177 transcripts. Inter-coder consistency (i.e. the consistency with which each researcher  
47  
48 178 coded the same statement into the same domain) was calculated using a Kappa statistic.  
49  
50  
51 179 Disagreements were discussed and consensus reached in each instance. Coded raw data  
52  
53 180 was uploaded into a qualitative data sorting software (Codesort<sup>28</sup>) to facilitate further  
54  
55  
56 181 analysis.  
57  
58  
59  
60

1  
2  
3 182  
4  
5  
6 183

7 In the second stage of analysis (inductive coding), one researcher (SB) generated belief  
8 statements based on responses within each domain of the TDF. These belief statements  
9  
10 184 provided detail about the potential influence the domain had on the surgeon's clinical  
11 185 behaviour. The belief statement was worded such that it could describe multiple  
12 186 responses from different participants. Belief statements were reviewed by two further  
13 187 researchers (EN, MD) to check that they remained grounded in the raw data.  
14 188  
15  
16  
17  
18  
19  
20 189

21  
22 190 In the third stage of analysis, the domains most relevant to surgeon's behaviour were  
23 191 identified through group discussion. Relevancy was determined by: 1. Frequency of  
24 192 beliefs across transcripts and/or 2. The perceived strength of beliefs in influencing  
25 193 behaviour. To illustrate, the belief statement: 'I think that the percentage of my patients  
26 194 who achieve clinically meaningful improvement is higher than that reported in the  
27 195 literature' appeared in 17/20 transcripts and was considered to have a strong influence on  
28 196 surgeon's clinical behaviour, implying that behaviour change was unlikely if surgeons  
29 197 consider that their patients' outcomes are already optimised. 'Knowledge' was therefore  
30 198 identified as a relevant domain. Where the researchers considered that beliefs within and  
31 199 between domains represented similar barriers/facilitators, these were grouped into  
32 200 themes. We calculated frequencies of beliefs to provide the reader with a better  
33 201 understanding of the raw data and to assist us in identifying 'relevant' domains of the  
34 202 TDF. However, readers should be cognisant that the absence of a belief in a transcript is  
35 203 not the same as a lack of endorsement.  
36  
37  
38  
39  
40  
41  
42  
43  
44  
45  
46  
47  
48  
49  
50  
51  
52  
53  
54

55 204  
56  
57  
58  
59  
60

1  
2  
3 205 **Results**  
4

5  
6 206

7  
8 207 **Participants:**  
9

10  
11 208

12  
13 209 Aggregate data describing the demographics of the sample is provided to protect  
14  
15 210 individual anonymity. The sample comprised of 15 Consultant surgeons and five  
16  
17 211 Registrars. The surgeons' total experience performing TKA ranged from six months to 30  
18  
19 212 years (mean  $\pm$  SD, 12.9  $\pm$  9.3) and the number of TKAs performed each month ranged  
20  
21 213 from less than one to 12 (mean  $\pm$  SD, 5.9  $\pm$  3.0).  
22  
23  
24

25 214

26  
27 215 **Inter-rater reliability:**  
28

29  
30 216

31  
32 217 Across the 20 interview transcripts, 628 utterances were coded into the 14 domains.  
33  
34 218 There was good inter-coder reliability across all interviews and domains (Kappa = 0.74  
35  
36 219 Standard error Kappa  $\pm$  0.02)  
37  
38

39 220

40  
41 221 **Relevant domains:**  
42

43  
44 222

45  
46 223 Eleven TDF domains were identified as relevant: Knowledge; Behavioural regulation;  
47  
48 224 Memory attention and decision processes; Beliefs about capabilities; Skills; Goals;  
49  
50 225 Social/Professional role and identity; Intention; Beliefs about consequences;  
51  
52 226 Environmental context; and Reinforcement. Table 2 presents the relevant domains, with  
53  
54 227 specific belief statements supported by example quotes.  
55  
56  
57  
58  
59  
60

1  
2  
3 228  
4  
5

6 229 [Insert Table 2]  
7  
8

9 230  
10

11 231 **Themes identified:**  
12

13 232  
14

15 233 1. Knowledge of one's own patient outcomes  
16

17 234 (Relevant TDF domains: Goals; Knowledge; Behavioural regulation; and Beliefs about  
18  
19 235 capabilities)  
20  
21

22 236  
23

24 237 All participants stated their goal was to optimise outcomes for their patients:  
25  
26

27 238  
28

29 239 *"Ultimately, we will always do our best for the patient" (024)*  
30  
31

32 240  
33

34 241 While almost all participants (n=19) were aware of the literature that up to 20 per cent of  
35  
36 242 patients undergoing TKA have no clinically meaningful improvement from surgery, most  
37  
38 243 believed that this percentage was significantly lower in the patients they operated on:  
39  
40

41 244  
42

43 245 *"I don't count it, but you get an impression. Around 10 per cent of my patients would be*  
44  
45 246 *saying they are not entirely satisfied by surgery" (016)*  
46  
47

48 247  
49

50  
51 248 All participants based this estimation on patient presentations at post-surgical follow-up  
52  
53 249 appointments. However, participants acknowledged the 'rose-coloured glasses' they saw  
54  
55  
56  
57  
58  
59  
60

1  
2  
3 250 their patients through, citing the subtleties of rapport that made patients less likely to  
4  
5  
6 251 report dissatisfaction with surgery:  
7

8 252

9  
10 253 *“To please you, patients often say it is doing better than it really is. So I would think my*  
11  
12 254 *outcomes are better than 20 per cent, but I am aware of the glasses that I see it through*  
13  
14 255 *as well as what patients might tell me” (014)*  
15  
16

17 256

18  
19  
20 257 Participants recognised that patients with poor post-surgical outcomes may be less likely  
21  
22 258 to attend follow-up appointments, choosing to seek care elsewhere. Many participants  
23  
24 259 reported that tracking long-term patient outcomes through an existing joint registry could  
25  
26 260 counter-act this, providing a mechanism for them to reflect on any discrepancies between  
27  
28 261 their perceived and actual clinical outcomes:  
29  
30

31 262

32  
33  
34 263 *“If patients choose not to come back, the only way you have got to track them is looking*  
35  
36 264 *at your results from the registry. But I want to know the answers to the clinical questions*  
37  
38 265 *– are you happy? Is your pain better than it was pre-op? How you ask the question*  
39  
40 266 *matters” (028)*  
41  
42

43 267

44  
45  
46 268 Indeed, a key problem identified by many participants was how to define clinically  
47  
48 269 meaningful improvement. Several participants emphasised the importance of ‘asking the  
49  
50 270 right question in the right way’:  
51

52 271  
53  
54  
55  
56  
57  
58  
59  
60

1  
2  
3 272 *“If you received feedback that the rate of clinically meaningful improvement reported by*  
4  
5  
6 273 *your patients is not as high as you think it should be, I would want to check who is asking*  
7  
8 274 *the questions, what they are asking and how they are asking it” (023)*  
9

10 275

11  
12 276 *“To me a good result is: they are going to have some intermittent ache in the knee,*  
13  
14  
15 277 *they’re not going to be able to kneel or squat. Others on some assessment scale might*  
16  
17 278 *consider that a failure. So you have get those parameters right” (010)*  
18  
19

20 279

21  
22 280 The discrepancy between participants’ perceptions of clinically meaningful improvement  
23  
24 281 and that of their patients was commonly attributed to mis-matched surgeon-patient pre-  
25  
26  
27 282 surgical expectations of TKA. Participants’ reported their expectations of TKA to be a  
28  
29 283 resolution of joint pathology with some corresponding improvement in pain. While  
30  
31 284 disease and pain severity were key considerations in surgical decision-making, all  
32  
33 285 participants acknowledged that patient expectations were important:  
34  
35

36 286

37  
38  
39 287 *“At the end of the day if there is a pathology that can be deleted by surgery and the*  
40  
41 288 *patient accepts some improvement then that means that the surgery will happen” (025)*  
42

43 289

44  
45  
46 290 *“If the patients’ expectations are not meeting mine, I won’t do the operation because*  
47  
48 291 *then the patient isn’t happy and sometimes they have 2/10 pain and they are not happy”*  
49  
50 292 *(013)*  
51

52 293

53  
54  
55 294 2. Reliance on ‘clinical intuition’  
56  
57  
58  
59  
60

1  
2  
3 295

4  
5 296 (Relevant TDF domains: Memory, attention and decision processes; and Skills)

6  
7  
8 297

9  
10 298 For many participants, the accurate assessment of patient expectations presented a  
11  
12 299 challenge. While the physical aspects of the clinical assessment were routine skills that  
13  
14 300 all participants believed they had mastered well, many junior and senior surgeons  
15  
16 301 reported difficulties assessing the psychological aspects of the patients' presentation:

17  
18  
19  
20 302

21  
22 303 *"It is patient factors more than anything else. Because it is very easy to look at xrays and*  
23  
24 304 *use the Kellgren-Lawrence scale: one to four for disease severity. There is not much of*  
25  
26 305 *an argument over that. It's about the patient factors, the psychology and behavioural*  
27  
28 306 *aspects of it which you want reassurance for"* (016)

29  
30  
31  
32 307

33  
34 308 Only a few participants were aware of any validated tools to assess pre-surgical patient  
35  
36 309 predictive factors. Only one participant had prior knowledge of a decision aid but had not  
37  
38 310 used it. Participants relied on their 'clinical intuition' for patients who were less likely to  
39  
40 311 do well, developing a 'gut-feeling' for patients over time:

41  
42  
43  
44 312

45  
46 313 *"You spend all your life looking at patients and assessing them and you start to develop a*  
47  
48 314 *bit of a gut feeling as to what might be happening. Sometimes you sit in front a patient*  
49  
50 315 *and think: I know you are telling me this, but I know something else is happening"* (015)

51  
52  
53 316

54  
55 317 3. The role of aids in supporting clinical decision-making



1  
2  
3 318  
4

5 319 (Relevant TDF domains: Intention; Reinforcement)  
6  
7

8 320  
9

10 321 Fifteen participants believed an aid would support decision-making, like a ‘barometer’ or  
11  
12 322 weather app to forecast outcomes, particularly in patients they were unsure about:  
13

14 323

15  
16  
17 324 *“I don’t think it would really influence my surgical decision-making, I think it would*  
18  
19 325 *more affirm my decision to not offer a patient an operation” (029)*  
20  
21

22 326

23  
24 327 *“If I think they are OK and they score badly I will relook at it and say why is that? Am I*  
25  
26 328 *missing something obvious? But at the end of the day if an aid says one thing and my sniff*  
27

28 329 *test says there is something not right, I’m still following my nose” (010)*  
29  
30

31 330  
32

33  
34 331 Participants believed an aid would be insensitive to nuances at an individual level and  
35  
36 332 could therefore not replace their clinical acumen:  
37

38 333

39  
40 334 *“Not every tool is perfect and it may not capture every patient... the danger is we may*  
41  
42 335 *end up refusing to do something because of an aid and therefore patients may not receive*  
43  
44 336 *the appropriate treatment. Nothing is 100 per cent so you have to expect some patients*  
45  
46 337 *would fall through the cracks” (019)*  
47  
48

49 338  
50

51  
52  
53 339 All participants expected to be provided with evidence that a decision aid had been  
54  
55 340 rigorously validated and shown to have high specificity and sensitivity before considering  
56  
57  
58  
59  
60

1  
2  
3 341 using it. Participants were more likely to trust this evidence if it came from their own  
4  
5 342 institution:

6  
7  
8 343

9  
10 344 *“I think people are mistrustful of things that come out of other institutions but I would*  
11  
12 345 *trust that a study from [the Department] would be a rigorous design. If the results*  
13  
14 346 *showed an aid was valid, I guess I would be prepared to try it and see whether I thought*  
15  
16 347 *it was valid in my hands, in my practice” (026)*  
17

18  
19  
20 348

21  
22 349 Indeed, half of the participants reported that evidence supporting the validity of a  
23  
24 350 decision aid would not be sufficient to convince them to use it. Instead they suggested  
25  
26 351 that they would need to see how an aid correlated with their own clinical decision-  
27  
28 352 making:

29  
30  
31 353

32  
33 354 *“I never trust evidence because you only have to go to Dr x ...even in research there’s a*  
34  
35 355 *lot of doubtful stuff... I know we have got to be evidenced-based but the evidence may*  
36  
37 356 *apply to a certain situation in a certain individual at a period in time and there is always*  
38  
39 357 *variations or exceptions around that. So I would try and correlate them in my own mind*  
40  
41 358 *and if after a while I’m seeing well that person is a bit odd and they are scoring badly on*  
42  
43 359 *the aid, well ok, this has legs.” (010)*  
44  
45

46  
47  
48 360

49  
50 361 4. Implications of a decision aid for patient-surgeon communication and shared decision-  
51  
52 362 making  
53

54  
55 363  
56  
57  
58  
59  
60

1  
2  
3 364 (Relevant TDF domains: Beliefs about consequences; Memory, attention and decision  
4  
5 365 processes)  
6  
7

8 366

9  
10 367 Participants perceived that a decision aid would give them an evidence-based approach  
11  
12 368 for saying ‘no’ to patients, particularly for those participants who reported difficulties  
13  
14 369 declining surgery:  
15

16  
17 370

18  
19  
20 371 *“I think that the main benefit of an aid would be making the patient understand if I am*  
21  
22 372 *saying no to the surgery it’s not because I don’t like him or her, it’s because there is data*  
23  
24 373 *written black on white that they are not going to do well...It will not just be my gut*  
25  
26 374 *feeling. I can give them data and say “sorry it’s written here. It’s not me it’s the*  
27  
28 375 *computer. So it backs up what I am saying” (013)*  
29

30  
31 376

32  
33  
34 377 Many participants believed an aid could be an important component of informed consent,  
35  
36 378 providing patients with objective data on their likely risk outcomes, enabling them to  
37  
38 379 have the appropriate expectations to weigh up the risk and benefits of surgery for  
39  
40 380 themselves. In this way, some participants saw a decision aid as a valuable support to  
41  
42 381 shared decision-making:  
43

44  
45 382

46  
47  
48 383 *“It comes back down to getting patient consent, as part of that I would incorporate it into*  
49  
50 384 *my consent form and say preoperatively you have a fifty-fifty chance and that has been*  
51  
52 385 *discussed with a validated tool. If the patient wishes to go ahead, they can make that*  
53  
54 386 *informed decision” (021)*  
55  
56  
57  
58  
59  
60

1  
2  
3 387

4  
5 388 Participants were divided in their responses when asked how they would feel about  
6  
7  
8 389 operating if a decision aid predicted a patient had a 50 per cent chance of not responding  
9  
10  
11 390 to TKA. While half agreed with the statement above that decisions to proceed would  
12  
13 391 need to be shared with the patient:

14  
15 392

16  
17 393 *“A patient may be so severely impacted that a one in two shot is worth it...it is totally*  
18  
19  
20 394 *patient dependent” (023)*

21  
22 395

23  
24 396 The other half reported they would not consider surgery unless there was a greater than  
25  
26  
27 397 80 per cent chance of responding:

28  
29 398

30  
31 399 *“You have got to be 95 per cent and above. I wouldn’t accept anything less than that. I*  
32  
33  
34 400 *wouldn’t offer the operation. It is too big an operation, too big a deal, too big a cost”*  
35  
36 401 *(024)*

37  
38 402

39  
40  
41 403 5. Ethical and legal concerns about decision aids

42  
43 404

44  
45 405 (Relevant TDF domain: Beliefs about consequences)

46  
47 406

48  
49  
50 407 A few participants had serious medico-legal concerns about documenting a specific risk  
51  
52  
53 408 value in patient records, and believed that such information would have to be deliberately  
54  
55 409 withheld from patients in case it fell into the ‘wrong’ hands:

1  
2  
3 410  
4  
5  
6 411

7 “You have to think of the medico-legal implications of a patient having a risk value  
8 documented in their notes. If they don’t have a good result and then lawyers look through  
9 and say you had this validated tool and you still went ahead, where would we lie medico-  
10 legally?” (024)  
11  
12  
13  
14  
15  
16 415

17 416 While a few participants believed it would be unethical *not* to use a decision aid if it had  
18 been shown to improve patient outcomes, others were concerned about the ethical  
19 implications of a tool if imposed cut-offs were used to deny patients surgery:  
20  
21  
22 418

23  
24  
25 419

26  
27 420 “I guess the ethicists would say you are denying patient-centred care, so that is where  
28 there is a potential for a can of worms” (021)  
29  
30  
31  
32 422

33  
34 423 “I don’t think it can become compulsory because it takes away patient-centred care”  
35 (025)  
36  
37 424  
38  
39 425

40  
41 426 6. Available resources and organisational culture as barriers to uptake  
42  
43 427

44  
45  
46 428 (Relevant TDF domains: Environmental context and resources; Beliefs about  
47 consequences and Social/Professional role and identity)  
48  
49 429  
50  
51 430

52  
53 431 Almost all participants expressed concerns about making an aid compulsory and  
54 imposing mandatory cut-off levels. While many recognised that implementing an aid in  
55  
56 432  
57  
58  
59  
60

1  
2  
3 433 this way would have the potential to improve the use of valuable resources and save  
4  
5 434 costs:

6  
7  
8 435

9  
10 436 *“If you could use the tool to triage patients and push them some where else, it would be*  
11  
12 437 *more effective for the patient and there would be cost savings for the hospital and the*  
13  
14 438 *community” (016)*

15  
16  
17  
18 439

19  
20 440 Several participants commented that mandatory cut-offs would only be possible if an  
21  
22 441 effective, non-operative alternative was made available for patients that were denied  
23  
24 442 surgery. A lack of effective surgical alternatives was seen as a key barrier:

25  
26  
27 443

28  
29 444 *“You have to be able to say ‘although we don’t think you would benefit from surgery,*  
30  
31 445 *we’re going to put you in this intense physiotherapy program with dieticians to improve*  
32  
33 446 *your knee pain’. They need to be offered something. The problem is these things are*  
34  
35 447 *available at an individual component level ... but I don’t think there is anything formally*  
36  
37 448 *put in place that patients can be referred from arthroplasty clinics into these programs”*  
38  
39 449 *(029)*

40  
41  
42  
43 450

44  
45  
46 451 Most participants perceived that the logistics of agreeing on a cut-off value for acceptable  
47  
48 452 risk, and the threat to surgeons’ professional identity as a patient-centred practitioner,  
49  
50 453 were insurmountable barriers to imposing mandatory cut-offs:

51  
52  
53 454  
54  
55  
56  
57  
58  
59  
60

1  
2  
3 455 *“A lot of surgeons would say in their hands they will get better results, that is just an*  
4  
5  
6 456 *inherent bias associated with surgical procedures and surgeons themselves so it would be*  
7  
8 457 *hard to agree on a level” (019)*  
9

10 458

11  
12 459 *“Surgeons wouldn’t care if it was compulsory to use an aid, as long as they didn’t have*  
13  
14  
15 460 *to do any work. Making it compulsory to follow it would be dangerous. Because we’re all*  
16  
17 461 *individuals, what you are doing is taking the human experience aspect of the consultation*  
18  
19 462 *out and then you turn us into proceduralists that just look at a tick box and operate on*  
20  
21 463 *someone” (016)*  
22  
23

24 464

25  
26  
27 465 7. Format and content of a decision aid  
28

29 466

30  
31 467 (Relevant TDF domain: Environmental context and resources)  
32  
33

34 468

35  
36 469 Finally, participants did not believe it would be difficult to physically integrate an aid  
37  
38 470 into clinical practice. An electronic or online format was seen as the most likely way an  
39  
40 471 aid could be implemented, particularly given the strict time constraints placed on  
41  
42 472 outpatient clinics:  
43  
44

45 473

46  
47  
48 474 *“I can imagine something working on the phone, an app. Simple and intuitive - so you*  
49  
50 475 *put in a little info - BMI, age, degree of arthritis etc... tick tick tick. And then it gives you*  
51  
52 476 *the number, bang” (013)*  
53  
54

55 477  
56  
57  
58  
59  
60

1  
2  
3 478 Most believed that an aid would be best used within the patient-surgeon consultation:  
4  
5

6 479  
7

8 480 *“I think it’s something that should be done by the surgeon. It is also part of the process*

9  
10 481 *where the surgeon gets to know the patient as well - not just their xrays and physical*

11  
12 482 *examination but also their psychosocial situation” (019)*  
13  
14

15 483  
16

17 484 While others suggested that an aid could be designed for patients to use on their own or

18  
19 485 with a support network to save time in the clinical consultation:  
20  
21

22 486  
23

24 487 *“A lot of patients look on my website. You could have a thing on your website saying:*

25  
26 488 *‘sometimes patients with certain problems may not be appropriate for a TKA, this test*

27  
28 489 *can give you a rough idea of your likely success rate’. You could put it out there before*

29  
30 490 *they even come to see you. ‘Is this operation for you?’ type of thing” (028)*  
31  
32

33 491  
34  
35

36 492 **Irrelevant domains:**  
37

38 493  
39

40  
41 494 Three domains were not considered to have a salient influence on the target behaviour.  
42

43 495 These were: Optimism, Emotion and Social Influences. Optimism was closely connected  
44

45 496 to the domain Reinforcement i.e. surgeons reported being neither optimistic nor  
46

47 497 pessimistic about the utility of an aid until they had seen evidence of its effectiveness.  
48

49 498 The Emotion domain did not appear relevant as described by one surgeon: “I am not  
50

51 499 worried about the implications of a tool. Knee replacement is wellness surgery, in the  
52

53 500 worst case scenario they don't get a new knee”. The Social Influence of patients did not  
54  
55  
56  
57  
58  
59  
60



1  
2  
3 501 appear relevant as surgeons believed patients were accustomed to filling out  
4  
5 502 questionnaires. While surgeons were more likely to trust an aid if it had been developed  
6  
7  
8 503 by their peers, they preferred to test the tool ‘in their own hands’ and therefore the Social  
9  
10 504 Influences of other surgeons using an aid appeared limited.

11  
12  
13 505

14  
15 506 **Discussion**

16  
17 507

18  
19  
20 508 These findings have implications for the future design and implementation of decision  
21  
22 509 aids into surgical clinical practice. It is possible that current decision-making biases may  
23  
24 510 be key barriers to uptake. Surgical decision-making involves the consideration of the  
25  
26 511 risks versus benefits of surgery.<sup>29</sup> In this study, participants expressed confidence in their  
27  
28 512 ability to successfully remove diseased tissue and correct joint deformity, and the  
29  
30 513 likelihood of some corresponding improvement in pain severity was perceived to be high.  
31  
32 514 At the same time, participants perceived that the risk their patients would not respond to  
33  
34 515 TKA was low. One potential explanation for this is an apparent lack of clarity around the  
35  
36 516 definition of ‘clinically meaningful improvement’ and ‘non-response’. The literature  
37  
38 517 suggests that patients’ perceptions of ‘clinically meaningful improvement’ depend on  
39  
40 518 their satisfaction with improvements in pain and function, closely linked to their  
41  
42 519 expectations of surgery.<sup>30</sup> In contrast, the surgeons in this study believed that a resolution  
43  
44 520 in joint pathology and some corresponding improvement pain could be considered  
45  
46 521 ‘meaningful improvement’. This lack of clarity is important, as surgeons who believe that  
47  
48 522 their patient outcomes are already optimised may be less motivated to use a decision aid.  
49  
50  
51  
52  
53  
54  
55  
56  
57  
58  
59  
60

523

1  
2  
3 524 Another explanation may be that surgeons in this sample exhibited an over-confidence  
4  
5  
6 525 bias. Indeed, most participants believed their own patient outcomes were better than that  
7  
8 526 reported in the literature. While it is possible that this belief is accurate and outcomes  
9  
10 527 amongst this sample of surgeons are indeed above average, similar observations were  
11  
12 528 made in a survey study involving 700 Orthopaedic Surgeons in Europe and North  
13  
14 529 America.<sup>31</sup> In that study, 83 per cent of surgeons surveyed considered themselves to be  
15  
16  
17 530 above average diagnosticians; 74 per cent believed they were above average surgeons and  
18  
19 531 25 per cent believed they were in the top five per cent of surgeons.<sup>31</sup> This over-  
20  
21 532 confidence bias may lead to a confirmation bias in which surgeons only notice things that  
22  
23 533 agree with their point of view and are less attentive to alternative viewpoints due to  
24  
25  
26 534 cognitive dissonance.<sup>32</sup> A confirmation bias can have consequences for the uptake of a  
27  
28 535 decision aid as surgeons may be less likely to consider evidence that contradicts their  
29  
30  
31 536 clinical experience.

32  
33  
34 537

35  
36 538 Surgical decision-making also involves weighing up of the risks versus benefits of non-  
37  
38 539 operative interventions.<sup>29</sup> The participants highlighted a lack of effective non-operative  
39  
40 540 interventions for end-stage knee OA. A study among Dutch Orthopaedic Surgeons  
41  
42 541 similarly documented a lack of confidence in the efficacy of non-surgical treatments  
43  
44 542 associated with a decreased referral rate.<sup>33</sup> Indeed, there is currently a dearth of evidence-  
45  
46 543 based, non-operative interventions for patients with end-stage knee OA either as an  
47  
48 544 alternative to surgery or as a definitive management when the patient is deemed  
49  
50 545 unsuitable for TKA. In the absence of a treatment alternative, surgery with all its risks  
51  
52  
53 546 and costs is often the default intervention. This is an important barrier to uptake as  
54  
55  
56  
57  
58  
59  
60

1  
2  
3 547 evidence suggests surgeons will not use an aid if they do not have the resources to carry  
4  
5 548 out the decisions,<sup>27</sup> or if the aid does not support their own view about effective  
6  
7  
8 549 treatments.<sup>34</sup>  
9

10 550

11  
12 551 The participants in this study believed a decision aid could promote shared decision-  
13  
14 552 making and enhance informed consent for TKA. Similar attitudes towards decision aids  
15  
16  
17 553 were identified in a previous review<sup>8</sup> and a survey of the wider population of Orthopaedic  
18  
19 554 Surgeons.<sup>17</sup> It may be that surgeons can be motivated to uptake a decision aid because it  
20  
21 555 is the ethical thing to do.<sup>35</sup> However, our study identified concerns about the ethical  
22  
23 556 implications of imposing mandatory cut-offs that would determine eligibility for TKA.  
24  
25  
26 557 These concerns may reflect the participants' desire to defend professional discretion and  
27  
28 558 autonomy. We take the opportunity to emphasise the function of a decision aid is to  
29  
30 559 support, not replace, clinical decision making. However, concerns were also expressed  
31  
32 560 about the legal implications of using a decision aid. This finding contrasts with a study  
33  
34 561 involving US Orthopaedic Surgeons who believed decision aids may reduce litigation  
35  
36 562 and malpractice insurance premiums by enhancing shared decision-making.<sup>36</sup> It may be  
37  
38 563 that these concerns are unique to the medico-legal context of Australia. Certainly,  
39  
40 564 surgeons will be less likely to be uptake a tool if they perceive it makes them vulnerable  
41  
42  
43 565 to medico-legal action.  
44  
45  
46  
47

48 566

49  
50 567 **Implications:**

51  
52 568  
53  
54  
55  
56  
57  
58  
59  
60

1  
2  
3 569 The Ready, Willing and Able model posits that these three preconditions must be  
4  
5 570 satisfied before a decision aid will be adopted.<sup>37</sup> ‘Ready’ refers to the perceived benefit of  
6  
7 571 changing the status quo and adopting an aid to support decision-making. ‘Willing’ refers  
8  
9 572 to the perceived legitimacy of a decision aid and a willingness to overcome objections  
10  
11 573 and concerns. ‘Able’ refers to the ability to adopt the decision aid given available  
12  
13 574 resources.<sup>38</sup> Implications for enhancing the readiness, willingness and ability of  
14  
15 575 Australian Orthopaedic Surgeons to uptake a TKA decision aid are described below.  
16  
17  
18  
19

20 576  
21  
22 577 To enhance Readiness to uptake, current decision-making biases may need to be  
23  
24 578 addressed. Information to counter these biases could be provided through audit and  
25  
26 579 feedback. Audit and feedback is defined as a ‘summary of the clinical performance of  
27  
28 580 healthcare provider(s) over a specified period of time’ (p. 5).<sup>39</sup> It may be particularly  
29  
30 581 effective when clinicians’ ability to accurately self-assess is limited.<sup>40</sup> This assumes that  
31  
32 582 clinicians are motivated to improve care but lack intention to change current behaviour  
33  
34 583 because they are unaware of their suboptimal performance. While effect sizes may  
35  
36 584 depend on the format and context in which feedback is provided, findings from a  
37  
38 585 Cochrane review suggest that audit and feedback can yield important improvements in  
39  
40 586 professional practice.<sup>39</sup> Clarity and consensus on the definition of ‘clinically meaningful  
41  
42 587 improvement’ and ‘non-response’ to TKA is likely to influence the success of an audit  
43  
44 588 and feedback intervention in this context. Future research is needed to explore how audit  
45  
46 589 and feedback is best delivered in this context including the immediacy and frequency of  
47  
48 590 feedback, and the potential to incorporate other approaches such as the use of surgeon  
49  
50 591 incentives.<sup>41</sup>  
51  
52  
53  
54  
55  
56  
57  
58  
59  
60

1  
2  
3 592  
4  
5  
6 593

7 To enhance Willingness to uptake, an audit and feedback intervention before and after  
8 594 using a decision aid may be necessary for Orthopaedic Surgeons to gain confidence in its  
9 legitimacy. The findings suggest that validating a decision aid in large multi-centre trials  
10 595 may not be sufficient to encourage uptake, as surgeons believed such trials do not  
11 596 account for variations in case load and years of experience. Surgeons perceived  
12 597 themselves as not only scientists, but also ‘artists’; believing that surgical success  
13 598 depended, in part, on the ‘hands’ that performed it. This suggests that Orthopaedic  
14 599 Surgeons may need to be given the opportunity to validate a decision aid ‘in their own  
15 600 hands’.  
16 601  
17  
18  
19  
20  
21  
22  
23  
24  
25  
26  
27  
28

29 602

30 603 Addressing concerns about the medico-legal implications of a decision aid may also be  
31 604 necessary to enhance Willingness to uptake. This may require the consultation of  
32 605 multiple stakeholders including policy makers, lawyers and institutional administration  
33 606 before the implementation of a decision aid. Legislative changes in the United States  
34 607 have recognised decision aids as a higher standard of informed consent<sup>7</sup> and in the United  
35 608 Kingdom, incentives to use decision aids are being developed.<sup>8</sup> There is evidence that  
36 609 mandating the use of a decision aid as a requirement for gaining informed consent results  
37 610 in significantly improved patient-outcomes including a reduction in the rate of TKA by  
38 611 38 per cent in a six-month period.<sup>42</sup> Future studies are required to explore if policy  
39 612 changes and/or incentives might influence Willingness to uptake a decisions aid in the  
40 613 Australian context.  
41  
42  
43  
44  
45  
46  
47  
48  
49  
50  
51  
52  
53  
54

55 614  
56  
57  
58  
59  
60

1  
2  
3 615 To enhance Ability to uptake, it appears important to address the dearth of non-operative  
4  
5 616 alternatives to surgery for end-stage knee OA so that surgeons have the resources to carry  
6  
7  
8 617 out decisions. Future research to design and implement effective, evidence-based, non-  
9  
10 618 operative interventions should be a priority. Targeting Orthopaedic Surgeons' beliefs  
11  
12 619 about the efficacy of such interventions through education strategies will also be  
13  
14 620 important. The study findings suggest that Ability to uptake may be enhanced if a  
15  
16 621 decision aid is packaged in an electronic or online format that is quick and easily  
17  
18 622 accessible. Focus groups involving surgeons and patients to gain feedback on prototypes  
19  
20 623 of a decision aid during the design phase is important to ensure that not only the format,  
21  
22 624 but also content, are accessible to a range of end users.  
23  
24  
25  
26  
27  
28

625

## 626 **Conclusions**

627

628 Using a theoretical framework to systematically explore barriers and facilitators to  
629 uptake, this study will inform the design and implementation of future TKA decision  
630 aids.<sup>12</sup> The findings suggest that a multifaceted approach will be required to ensure that  
631 Orthopaedic Surgeons are ready, willing and able to use a decision aid that can reduce the  
632 suffering and economic burden of 'failed' TKA. Research exploring patients' beliefs and  
633 attitudes towards a TKR decision aid is required prior to implementation.

634

## 635 **Abbreviations**

636 TKA = Total Knee Arthroplasty

637 OA = Osteoarthritis

638

639

640

641

642

643

1  
2  
3 638 TDF = Theoretical Domains Framework  
4  
5  
6 639  
7

8 640 **Declarations**  
9

10 641 **Ethics approval:** This study was carried out in compliance with the Helsinki  
11  
12 642 Declaration. Approval was given by St Vincent's Hospital Melbourne, Australia (QA 019  
13  
14 /\_16).  
15  
16

17 644 **Availability of data and materials:** Requests regarding the datasets used in this study  
18  
19 645 can be directed to the first author. Full interview transcripts will not be shared to protect  
20  
21 646 the anonymity of the study participants.  
22  
23

24 647 **Competing interests:** The authors declare that they have no competing interests  
25  
26

27 648 **Funding:** This project was supported by a University of Melbourne FBE/MDHS  
28  
29 649 Collaborative Research Seed-Funding Grant (2015).  
30  
31

32 650 **Authors contributions:** SB: led the study design, data collection, data analysis and  
33  
34 651 manuscript preparation. EN contributed to the data analysis. AS, PC and MD contributed  
35  
36 652 to the study design, data analysis and manuscript preparation. SF contributed to the study  
37  
38 653 design and manuscript preparation.  
39  
40

41 654 **Acknowledgements:** We acknowledge Pascal Buenzli for assistance with the data  
42  
43 655 management software and inter-rater reliability calculation. We extend our thanks to all  
44  
45 656 the surgeons for kindly donating their time to participate in this study.  
46  
47

48 657

49 658

50 659 **References:**  
51  
52 660

53 661 1. Cobos R, Lattore A. Variability of indication criteria in knee and hip replacement:  
54 662 An observational study. *BMC Musculoskeletal Disorders* 2010;11(249)  
55  
56  
57  
58  
59  
60

- 1  
2  
3 663 2. Dowsey M, Smith A, Choong P. Latent Class Growth Analysis predicts long term  
4 664 pain and function trajectories in total knee arthroplasty: a study of 689  
5 665 patients. *Osteoarthritis and Cartilage* 2015;23(12):2141-49.
- 6 666 3. Riddle DL, Jiranek WA, Hayes CW. Use of a validated algorithm to judge the  
7 667 appropriateness of total knee arthroplasty in the United States: a multicenter  
8 668 longitudinal cohort study. *Arthritis & rheumatology* 2014;66(8):2134-43. doi:  
9 669 10.1002/art.38685
- 10 670 4. Curtis AJ, Wolfe R, Russell COH, et al. Determining priority for joint replacement:  
11 671 comparing the views of orthopaedic surgeons and other professionals. *The*  
12 672 *Medical Journal of Australia* 2011;195(11):699-702. doi:  
13 673 10.5694/mja10.11052
- 14 674 5. Frankel L, Sanmartin C, Hawker G, et al. Perspectives of orthopaedic surgeons on  
15 675 patients' appropriateness for total joint arthroplasty: a qualitative study.  
16 676 *Journal of evaluation in clinical practice* 2016;22(2):164-70. doi:  
17 677 10.1111/jep.12449
- 18 678 6. Gooberman-Hill R, Sansom A, Sanders C, et al. Unstated factors in orthopaedic  
19 679 decision-making: A qualitative study. *BMC Musculoskeletal Disorders*  
20 680 2010;11(213)
- 21 681 7. Kuehn B. States explore shared decision making. *JAMA* 2009;301(24):2539-41.
- 22 682 8. Jayadev C, Khan T, Coulter A, et al. Patient decision aids in knee replacement  
23 683 surgery. *Knee* 2012;19(6):746.
- 24 684 9. Van den Bart B, Zwikker H, van den Ende C. Medication adherence in patients with  
25 685 rheumatoid arthritis: a critical appraisal of the existing literature. *Expert*  
26 686 *Reviews in Clinical Immunology* 2012;8:337-51.
- 27 687 10. Feldman-Stewart D, Brennenstuhl S, McIssac K, et al. A systematic review of  
28 688 information in decision aids. *Health Expectations* 2007;10(1):46-61.
- 29 689 11. Sacks GD, Dawes AJ, Ettner SL, et al. Impact of a Risk Calculator on Risk  
30 690 Perception and Surgical Decision Making: A Randomized Trial. *Annals of*  
31 691 *surgery* 2016 doi: 10.1097/SLA.0000000000001750
- 32 692 12. Dowsey M, Spelman T, Choong P. Development of a prognostic nomogram for  
33 693 predicting the probability of nonresponse to total knee arthroplasty 1 year  
34 694 after surgery. *Journal of Arthroplasty* 2016;In press
- 35 695 13. Barsoum W, Murray T, Klika A, et al. Predicting patient discharge disposition  
36 696 after total joint arthroplasty in the United States. *Journal of Arthroplasty*  
37 697 2010;25(6):885-92.
- 38 698 14. Kattan M. Nomograms are difficult to beat. *European Urology* 2008;53(4):671.
- 39 699 15. Stacey D, Bennett C, Barry M, et al. Decision aids for people facing health  
40 700 treatment or screening decisions. *Cochrane Database of Systematic Reviews*  
41 701 2011(10):CD001431.
- 42 702 16. Knops AM, Legemate DA, Goossens A, et al. Decision aids for patients facing a  
43 703 surgical treatment decision: a systematic review and meta-analysis. *Annals of*  
44 704 *surgery* 2013;257(5):860-6. doi: 10.1097/SLA.0b013e3182864fd6
- 45 705 17. Adam J, Khaw F, Thomson R, et al. Patient decision aids in joint replacement  
46 706 surgery: A literature review and an opinion survey of consultant orthopaedic  
47 707 surgeons. *Annals of the Royal College of Surgeons of England* 2008;90(3):198-  
48 708 207.



- 1  
2  
3 709 18. Phillips C, Marshall A, Chaves N, et al. Experiences of using the Theoretical  
4 710 Domains Framework across diverse clinical environments: A qualitative  
5 711 study. *Journal of Multidisciplinary Healthcare* 2015;8:139-46. doi:  
6 712 10.2147/JMDH.S78458  
7  
8 713 19. Eccles M, Grimshaw J, Walker A, et al. Changing the behaviour of healthcare  
9 714 professionals: the use of theory in promoting the uptake of research findings.  
10 715 *Journal of Clinical Epidemiology* 2005;58:107-12.  
11  
12 716 20. Noar S, Zimmerman R. Health behaviour theory and cumulative knowledge  
13 717 regarding health behaviours: Are we moving in the right direction? *Health*  
14 718 *Education Research* 2005;20(3):275-90.  
15  
16 719 21. Cane J, O'Connor D, Michie S. Validation of the theoretical domains framework  
17 720 for use in behaviour change and implementation research *Implementation*  
18 721 *Science* 2012;7(37)  
19  
20 722 22. Sansom A, Donovan J, Sanders C, et al. Routes to total joint replacement surgery:  
21 723 patients' and clinicians' perceptions of need. *Arthritis Care and Research*  
22 724 2010;62(9):1252-57.  
23  
24 725 23. Michie S, Johnston M, Abraham C, et al. Making psychological theory useful for  
25 726 implementing evidence based practice: A consensus approach. *Qualitative*  
26 727 *and Safety in Health Care* 2005;14:26-33. doi: 10.1136/qshc.2004.011155  
27  
28 728 24. Dobson F, Bennell K, French S, et al. Barriers and facilitators to exercise  
29 729 participation in people with hip and/or knee osteoarthritis. *American Journal*  
30 730 *of Physical Medicine and Rehabilitation* 2016;95(5):372-89.  
31  
32 731 25. French S, Green S, O'Connor D, et al. Developing theory-informed behaviour  
33 732 change interventions to implement evidence into practice: A systematic  
34 733 approach using the Theoretical Domains Framework. *Implementation Science*  
35 734 2012;7(38)  
36  
37 735 26. Patey A, Islam R, Francis J, et al. Anaesthesiologists' and surgeons' perceptions  
38 736 about routine pre-operative testing in low risk patients: application of the  
39 737 Theoretical Domains Framework to identify factors that influence physicians'  
40 738 decisions to order pre-operative tests. *Implementation Science* 2012;7(52)  
41  
42 739 27. Sepucha KR, Mulley AG. Extending decision support: preparation and  
43 740 implementation. *Patient Education and Counseling* 2003;50(3):269-71. doi:  
44 741 10.1016/s0738-3991(03)00048-x  
45  
46 742 28. Buenzli P. Codesort software, 2012.  
47 743 29. Sacks GD, Dawes AJ, Ettner SL, et al. Surgeon Perception of Risk and Benefit in  
48 744 the Decision to Operate. *Annals of surgery* 2016 doi:  
49 745 10.1097/SLA.0000000000001784  
50  
51 746 30. Hawker G, Bohm ER, Conner-Spady B, et al. Perspectives of Canadian  
52 747 Stakeholders on Criteria for Appropriateness for Total Joint Arthroplasty in  
53 748 Patients With Hip and Knee Osteoarthritis. *Arthritis & rheumatology*  
54 749 2015;67(7):1806-15. doi: 10.1002/art.39124  
55  
56 750 31. Teunis T, Janssen S, Guitton TG, et al. Do Orthopaedic Surgeons Acknowledge  
57 751 Uncertainty? *Clinical orthopaedics and related research* 2016;474(6):1360-9.  
58 752 doi: 10.1007/s11999-015-4623-0  
59  
60 753 32. Kahneman D. Thinking, fast and slow. New York, USA: Macmillan 2011.

- 1  
2  
3 754 33. Hofestede S, Marang-van de Mheen P, Vliet Vlieland T, et al. Barriers and  
4 755 facilitators associated with non-surgical treatment use for osteoarthritis  
5 756 patients in orthopaedic practice. *PLoS One* 2016 doi:  
6 757 DOI:10.1371/journal.pone.0147406  
7  
8 758 34. Elwyn G, Rix A, Holt T, et al. Why do clinicians not refer patients to online  
9 759 decision support tools? Interviews with front line clinics in the NHS. *BMJ*  
10 760 *open* 2012;2(6) doi: 10.1136/bmjopen-2012-001530  
11  
12 761 35. Tai-Seale M, Elwyn G, Wilson CJ, et al. Enhancing Shared Decision Making  
13 762 Through Carefully Designed Interventions That Target Patient And Provider  
14 763 Behavior. *Health affairs* 2016;35(4):605-12. doi: 10.1377/hlthaff.2015.1398  
15 764 36. Weinstein JN, Clay C, Morgan T. Informed patient choice: patient centred valuing  
16 765 of surgical risks and benefits. *Health affairs* 2007;26(3):726-30.  
17 766 37. Lesthaeghe R, Vanderhoeft C. Ready, willing and able: A conceptualization of  
18 767 transitions to new behavioral forms. In: Casterline J, ed. Diffusion processes  
19 768 and fertility transition: selected perspectives. Washington DC: National  
20 769 Academies Press 2001:240-64.  
21 770 38. Shultz C, Jimbo M. Decision aid use in primary care: An overview and theory-  
22 771 based framework. *Family Medicine* 2015;47(9):679-92.  
23 772 39. Ivers N, Jamtvedt G, Flottorp S, et al. Audit and feedback: effects on professional  
24 773 practice and healthcare outcomes (Review). *Cochrane Database of Systematic*  
25 774 *Reviews* 2012(6):CD000259.  
26 775 40. Davis D, Mazmanian P, Fordis M, et al. Accuracy of physician self-assessment  
27 776 compared with observed measures of competence: a systematic review.  
28 777 *JAMA* 2006;296(9):1094-102.  
29 778 41. Emanuel E, Ubel P, Kessler H, et al. Using behavioural economics to design  
30 779 physician incentives that deliver high-value care. *Annals of Internal Medicine*  
31 780 2016;164:114-19.  
32 781 42. Arterburn D, Wellman R, Westbrook E, et al. Introducing decision aids at Group  
33 782 Health was linked to sharply lower hip and knee surgery rates and costs.  
34 783 *Health affairs* 2012;31(9):2094-104. doi: 10.1377/hlthaff.2011.0686  
35  
36  
37  
38  
39  
40  
41  
42  
43  
44  
45  
46  
47  
48  
49  
50  
51  
52  
53  
54  
55  
56  
57  
58  
59  
60

1  
2  
3  
4  
5  
6  
7  
8  
9  
10  
11  
12  
13  
14  
15  
16  
17  
18  
19  
20  
21  
22  
23  
24  
25  
26  
27  
28  
29  
30  
31  
32  
33  
34  
35  
36  
37  
38  
39  
40  
41  
42  
43  
44  
45  
46  
47  
48  
49

Table 1. Interview Schedule

| TDF domain                 | Questions                                                                                                                                                                                                                                                                                                                                                                                                                                                                                                                                                                                                                                                                                                                                                                                                          |
|----------------------------|--------------------------------------------------------------------------------------------------------------------------------------------------------------------------------------------------------------------------------------------------------------------------------------------------------------------------------------------------------------------------------------------------------------------------------------------------------------------------------------------------------------------------------------------------------------------------------------------------------------------------------------------------------------------------------------------------------------------------------------------------------------------------------------------------------------------|
| Knowledge                  | <p><i>Evidence from the literature suggests that up to 22% of patients presenting for total knee arthroplasty will not have a clinically meaningful improvement from surgery.</i></p> <ul style="list-style-type: none"> <li>- What do you think about this figure?</li> <li>-How do you interpret the term ‘no clinically meaningful improvement’?</li> </ul> <p><i>For the purposes of this interview, we are interpreting clinically meaningful improvement as no improvement in pain, function or QOL following surgery.</i></p> <ul style="list-style-type: none"> <li>- Are you aware of what percentage of patients that you operate on do not benefit from surgery? How do you know this? Do you track it? Would you like to know? How could feed this information back to you? In what format?</li> </ul> |
| Beliefs about capabilities | <ul style="list-style-type: none"> <li>- How confident are you in identifying patients who are unlikely to experience an improvement in symptoms from TKR?</li> <li>- How good do you think you are at it compared to others?</li> <li>- Do you feel you are unsure about identifying these patients at times? If so, what would you do?</li> </ul>                                                                                                                                                                                                                                                                                                                                                                                                                                                                |
| Behavioural regulation     | <ul style="list-style-type: none"> <li>- Of all the patients referred to you, what is the % of patients that proceed to surgery and how many do you turn away?</li> <li>- What do you do with the ones that don’t? Do you refer them somewhere?</li> </ul>                                                                                                                                                                                                                                                                                                                                                                                                                                                                                                                                                         |
| Skills                     | <ul style="list-style-type: none"> <li>- What skills help you decide if someone is likely to benefit from surgery or not?</li> <li>- Are you aware of any tools currently available to help you assess a patients’ risk of not responding? Do you use them? Why/ why not?</li> </ul>                                                                                                                                                                                                                                                                                                                                                                                                                                                                                                                               |
| Beliefs about consequences | <p><i>Based on a set of evidence-based parameters, decision aids can predict the degree of risk that a patient will not achieve a clinically meaningful improvement from TKA</i></p> <ul style="list-style-type: none"> <li>-What do you think the benefits of using a decision aid might be?</li> <li>-What might be the disadvantages of using an aid?</li> <li>- Do you see anything legal or ethical about using a decision aid?</li> <li>-Would the benefits outweigh the potential harms? Why?</li> </ul>                                                                                                                                                                                                                                                                                                    |
| Intentions, Goal           | <ul style="list-style-type: none"> <li>-Would using a decision aid influence your surgical decision making? Why/why not?</li> </ul>                                                                                                                                                                                                                                                                                                                                                                                                                                                                                                                                                                                                                                                                                |

|                                       |                                                                                                                                                                                                                                                                                                                   |
|---------------------------------------|-------------------------------------------------------------------------------------------------------------------------------------------------------------------------------------------------------------------------------------------------------------------------------------------------------------------|
| Reinforcement                         | -What would motivate you to use a decision aid?<br>-Would you need to be presented with evidence from the literature? How would this evidence be best delivered? Who would it need to be delivered by?                                                                                                            |
| Environmental context and resources   | -What would facilitate the use of a decision aid for you?<br>-How would it best be packaged?<br>-When do you think it would be best used? Do you think you are the best person to use it?                                                                                                                         |
| Decision process                      | -If a decision aid predicted that patient had a 50% risk of not benefiting from surgery would you still operate? What about a 70% risk? What would your level of acceptable risk be?                                                                                                                              |
| Social/Professional role and identity | -Do you think there would be agreement between surgeons on this cut point?                                                                                                                                                                                                                                        |
| Social/Emotional influences           | -What if something like this tool became compulsory – how would you feel? How do you think other surgeons would feel?<br>-How do you think patients would respond? Would their response influence your use of an aid?<br>-Would you worry about missing potential candidates who might have responded to surgery? |
| Optimism                              | -How optimistic are you that a decision aid will reduce the rate of surgery in patients who are at high risk of not benefiting from surgery?                                                                                                                                                                      |

Table 2. Findings summary

| Relevant TDF Domains   | Specific Belief                                                                         | Facilitator or barrier | Example quote (participant code)                                                                                                                                                                                                                                                                                                                                                                                                                                                                  | Frequency out of 20 |
|------------------------|-----------------------------------------------------------------------------------------|------------------------|---------------------------------------------------------------------------------------------------------------------------------------------------------------------------------------------------------------------------------------------------------------------------------------------------------------------------------------------------------------------------------------------------------------------------------------------------------------------------------------------------|---------------------|
| Knowledge              | I am aware of the literature that up to 20% of patients do not have a CMI from TKR      | Facilitator            | “I think 22% is the high end. But there is a lot of different papers that all suggest 10,15,20%” (012)                                                                                                                                                                                                                                                                                                                                                                                            | 19                  |
|                        | I think that this % is lower in my patients                                             | Barrier                | “I don’t count it, but I think around 10% would be saying they aren’t entirely satisfied by surgery” (016)                                                                                                                                                                                                                                                                                                                                                                                        | 17                  |
|                        | Any improvement in pain is still an improvement, it depends how you define ‘meaningful’ | Barrier                | “If the surgery is done for the right reason, the pain would decrease, the question is whether the decrease would be 10%, 50% or 100% depending on whether there are other reasons for the pain. But there would be an improvement” (025)<br><br>“To me a good result is: they are going to have some intermittent ache in the knee, they’re not going to be able to kneel or squat. Others on some assessment scale might consider that a failure. So you have get those parameters right” (010) | 7                   |
| Behavioural regulation | I am aware that the feedback I get from my patients may be biased                       | Facilitator            | “To please you, patients often say it is doing better than it really is. So I would think my outcomes are better than 20%, but I am aware of the glasses that I see it through as well as what patients might tell me” (014)                                                                                                                                                                                                                                                                      | 6                   |
|                        | I would be interested in feedback on the                                                | Facilitator            | “There’s always a difference between how well you think you are doing and how you <i>are</i> doing. Having formal feedback on patient outcomes gives you the                                                                                                                                                                                                                                                                                                                                      | 20                  |

|                                          |                                                                                         |             |                                                                                                                                                                                                                                                                                                                                                                                                                                                                                                                                                                                                                                                                                                                                                        |    |
|------------------------------------------|-----------------------------------------------------------------------------------------|-------------|--------------------------------------------------------------------------------------------------------------------------------------------------------------------------------------------------------------------------------------------------------------------------------------------------------------------------------------------------------------------------------------------------------------------------------------------------------------------------------------------------------------------------------------------------------------------------------------------------------------------------------------------------------------------------------------------------------------------------------------------------------|----|
|                                          | percentage of my patients who achieve a clinically meaningful improvement               |             | <p>opportunity to change things if you are not doing as well as you want to” (023)</p> <p>“What I would like to know is the patient who overall is unhappy with their results and didn’t get the result they expected” (010)</p> <p>“I would like feedback on the number of patients who are in each category of satisfaction and I would like to see how my personal results are compared to the group” (016)</p>                                                                                                                                                                                                                                                                                                                                     |    |
| Memory, attention and decision processes | Patient expectations are an important consideration in surgical decision making         | Facilitator | “If the patients’ expectations are not meeting mine, I won’t do the operation because then the patient isn’t happy and sometimes they have 2/10 pain and they are not happy. And that is silly. So it is about telling the patient what they can expect and after the operation it is about ”you remember what we said” (013)                                                                                                                                                                                                                                                                                                                                                                                                                          | 20 |
|                                          | The lack of effective non-operative alternatives influences my surgical decision making | Barrier     | <p>“You have to be able to say ‘although we don’t think you would benefit from surgery, we’re going to put you in this intense physiotherapy program with dieticians to improve your knee pain. They need to be offered something. The problem is these things are available at an individual component level ... but I don’t think there is anything formally put in place that patients can be referred from arthroplasty clinics into these programs” (029)</p> <p>“Well if you make an alternative plan and say we are not going to do surgery we are going to lose weight, do some physiotherapy, take pain killers, you send them off and they come back and say they have done all of that. It means you don’t have another option to offer</p> | 12 |

|                            |                                                                                          |                                         |                                                                                                                                                                                                                                                                                                                                                                                                                                                              |    |
|----------------------------|------------------------------------------------------------------------------------------|-----------------------------------------|--------------------------------------------------------------------------------------------------------------------------------------------------------------------------------------------------------------------------------------------------------------------------------------------------------------------------------------------------------------------------------------------------------------------------------------------------------------|----|
|                            |                                                                                          |                                         | <p>them and those patients often just want an option and if there is an option you can give them it is easier to push them away from surgery” (016)</p> <p>“I think there are limitations on what you can improve with non-operative measures” (016)</p>                                                                                                                                                                                                     |    |
|                            | My threshold of acceptable risk for surgery is >80% likelihood of good outcome           | Facilitator                             | “You have got to be 95% and above. I wouldn’t accept anything less than that. I wouldn’t offer the operation. It is too big an operation, to bigger deal, too bigger cost” (024)                                                                                                                                                                                                                                                                             | 8  |
|                            | My level of acceptable risk is patient dependent                                         | Facilitator (of shared decision making) | <p>“It is all about risk for reward. When you think about... the person is not unwell, they can safely have an anaesthetic, even risks as high as 50% one in two that the patient will have no benefit, are worth considering...A patient may be so severely impacted that a 1 in 2 shot is worth it...it is totally patient dependent” (023)</p> <p>“I would rather a 10% chance of getting better than sitting in a wheelchair in a lot of pain” (022)</p> | 11 |
| Beliefs about capabilities | I find it difficult to assess the patient-related factors that can influence TKR outcome | Facilitator                             | <p>“It is patient factors more than anything else. Because it is easy to look at xrays and say K-L, 1, 2, 3, 4 for disease severity. There’s not much argument over that. It’s about the patient factors, the psychology and behavioural aspects of it which you want reassurance for” (016)</p> <p>“Obviously I am not very good because 1 in 5 come back with a problem... so no I didn’t know how to identify them pre- operatively. Something is</p>     | 8  |

|                                       |                                                                          |             |                                                                                                                                                                                                                                                                                                                                                                                                                                                                              |    |
|---------------------------------------|--------------------------------------------------------------------------|-------------|------------------------------------------------------------------------------------------------------------------------------------------------------------------------------------------------------------------------------------------------------------------------------------------------------------------------------------------------------------------------------------------------------------------------------------------------------------------------------|----|
|                                       |                                                                          |             | happening from my assessment to the patients' outcome and I don't know what the link is" (024)                                                                                                                                                                                                                                                                                                                                                                               |    |
|                                       | I am reasonably good at picking the patients who will do well            | Barrier     | "I think I am reasonably good... I do have a little bit of a gut feeling about patients" (013)                                                                                                                                                                                                                                                                                                                                                                               | 12 |
|                                       | It can be difficult to say no to patients                                | Facilitator | "Most of the time if we bring a patient to the case conference it is to get the support of everyone else to say no don't do it. Because if want to do the operation, you just go ahead and do it. If you don't want to do it and you want support that is when you take them along" (016)<br><br>"It is always easier to consent than decline" (025)                                                                                                                         | 5  |
| Skills                                | I mostly rely on my experience when it comes to surgical decision making | Barrier     | "You spend all your life looking at patients and assessing them and you start to develop a bit of a gut feeling as to what might be happening. Sometimes you sit in front a patient and think: I know you are telling me this, but I know something else is happening" (015)<br><br>"I don't use any formal tools. I use I guess old fashioned clinical acumen is what I would call it...I have been doing this for a while and you develop a way of assessing people" (028) | 10 |
| Social/professional role and identity | Surgery is an art and a science – it is not just about the evidence"     | Barrier     | "The human body is not a scientific machine. Medicine is an art and science and the art isn't always represented in the research" (028)<br><br>"I think that medicine is not about numbers, it is about patients. Each patient has their own different pathology and own different personality" (017)                                                                                                                                                                        | 10 |



| Beliefs/attitudes towards a decision aid |                                                                                         |             |                                                                                                                                                                                                                                                                                                                                                                                                                                                                                                                                                                                                                                                                      |    |
|------------------------------------------|-----------------------------------------------------------------------------------------|-------------|----------------------------------------------------------------------------------------------------------------------------------------------------------------------------------------------------------------------------------------------------------------------------------------------------------------------------------------------------------------------------------------------------------------------------------------------------------------------------------------------------------------------------------------------------------------------------------------------------------------------------------------------------------------------|----|
| Intention                                | I would use a decision aid to support, not replace my decision-making                   | Facilitator | <p>“I don’t think it would really influence my surgical decision making, I think it would more affirm my decision to not offer a patient an operation” (029)</p> <p>“If I think they are ok and they score badly I will relook at it and say why is that? Am I missing something obvious? But at the end of the day if an aid says one thing and my sniff test says there is something not right, I’m still following my nose” (010)</p>                                                                                                                                                                                                                             | 16 |
| Beliefs about consequences               | I think a decision aid would be a useful objective tool to help me say no to patients   | Facilitator | <p>“It would be clinically helpful in the patient cohort who we don’t think will do well from surgery, giving us an evidenced based approach for saying this is the reasons why we don’t think you will benefit from surgery” (029)</p> <p>“I think that the main benefit of an aid would be making the patient understand if I am saying no to the surgery it’s not because I don’t like him or her, it is because there is data written black on white that they are not going to do well. ..It will not just be my gut feeling. I can give them data and say ”sorry it is written here. It’s not me it’s the computer. So it backs up what I am saying” (013)</p> | 9  |
|                                          | I think an aid would be useful for gaining patient informed consent and shared decision | Facilitator | “I think that is one of the important things about a decision aid and part of the consent process is that they know what to expect and it is still the patients decision to decide if they want to have surgery or not, but they have to be appropriately informed and have the                                                                                                                                                                                                                                                                                                                                                                                      | 10 |

|               |                                                                                                                                             |             |                                                                                                                                                                                                                                                                                                                                                                                                                                                                                                                 |    |
|---------------|---------------------------------------------------------------------------------------------------------------------------------------------|-------------|-----------------------------------------------------------------------------------------------------------------------------------------------------------------------------------------------------------------------------------------------------------------------------------------------------------------------------------------------------------------------------------------------------------------------------------------------------------------------------------------------------------------|----|
|               | making                                                                                                                                      |             | appropriate expectations to weigh up the risk and benefit" (019)<br><br>"It comes back down to getting patient consent, as part of that I would incorporate it into my consent form and say preoperatively you have a 50:50 chance and that has been discussed with a validated tool" (021)                                                                                                                                                                                                                     |    |
|               | I think a decision aid has the potential to improve the use of resources and save costs                                                     | Facilitator | "If you could use a decision aid to triage patients and push them somewhere else, it would be more effective for the patient and there would be cost savings for the hospital and the community" (016)                                                                                                                                                                                                                                                                                                          | 7  |
|               | A disadvantage of a decision aid is that it may not capture the nuances of the individual patient and some patients may miss out on surgery | Barrier     | "There are always reasons why people will fall on one side of the line or the other and the data will show that the tool might predict you will do really well but you happen to fall in that small group who are set to do really well but don't, similarly the tool might say you will do really badly we better not operate on you but someone took the punt and you turned out really well so there are always those smaller groups and at times it is possible for the tool to miss certain nuances" (015) | 13 |
|               | I have concerns about the legal/ethical implications of a decision aid                                                                      | Barrier     | "You have to think of the medico-legal implications of a patient having a risk value documented in their notes. If they don't have a good result and then lawyers look through and say you had this validated tool and you still went ahead, where would we lie medico-legally?" (024)<br><br>"I guess the ethicists would say you are denying patient-centred care, so that is where there is a potential for a can of worms" (021)                                                                            | 8  |
| Environmental | I would not like to                                                                                                                         | -*          | "I don't think there are things that can become                                                                                                                                                                                                                                                                                                                                                                                                                                                                 | 17 |

|                                                           |                                                                              |             |                                                                                                                                                                                                                                                                                                                                                                                                                                                                                                                                                                                                                                                                                                                                          |    |
|-----------------------------------------------------------|------------------------------------------------------------------------------|-------------|------------------------------------------------------------------------------------------------------------------------------------------------------------------------------------------------------------------------------------------------------------------------------------------------------------------------------------------------------------------------------------------------------------------------------------------------------------------------------------------------------------------------------------------------------------------------------------------------------------------------------------------------------------------------------------------------------------------------------------------|----|
| context and resources (how the tool might be implemented) | see a decision aid with mandatory cut-offs implemented                       |             | <p>compulsory in terms of a decision aid as I mentioned because it takes away patient-centred care” (025)</p> <p>“No you can’t make anything compulsory like that. Not in medicine. Medicine is not black and white, it is grey, you can never make anything compulsory because a surgeon will operate according to their experience” (024)</p> <p>“Surgeons wouldn’t care if it was compulsory to use an aid, as long as they didn’t have to do any work. Making it compulsory to follow it would be dangerous. Because we’re all individuals, what you are doing is taking the human experience aspect of the consultation out and then you turn us into proceduralists that just look at a tick box and operate on someone” (016)</p> |    |
|                                                           | I don’t think surgeons could ever agree on a cut-off level on a decision aid | -*          | <p>“A lot of surgeons would say in their hands they will get better results, that is just an inherent bias associated with surgical procedures and surgeons themselves so it would be hard to agree on a level” (019)</p> <p>“Unless you can clearly demonstrate a certain cut-off does better, so until there is almost black and white there will be some shades of grey and surgeons will differ in those shades of grey. And even if there is evidence you will still get surgeons that will reject it. That is just my feeling” (021)</p>                                                                                                                                                                                           | 17 |
|                                                           | I could see an electronic or online tool working well in                     | Facilitator | “I can imagine something working on the phone, just an app. Simple and intuitive so you put in a little info - BMI, age, degree of arthritis etc.. tick tick tick. And                                                                                                                                                                                                                                                                                                                                                                                                                                                                                                                                                                   | 6  |

|               |                                                                                                                                                 |         |                                                                                                                                                                                                                                                                                                                                                                                                                                                                                                                                                                                                                                                                                                 |   |
|---------------|-------------------------------------------------------------------------------------------------------------------------------------------------|---------|-------------------------------------------------------------------------------------------------------------------------------------------------------------------------------------------------------------------------------------------------------------------------------------------------------------------------------------------------------------------------------------------------------------------------------------------------------------------------------------------------------------------------------------------------------------------------------------------------------------------------------------------------------------------------------------------------|---|
|               | my practice                                                                                                                                     |         | then it gives you the number, bang.” (013)<br><br>“A lot of patients look on my website. You could have a thing on your website saying: ‘sometimes patients with certain problems may not be appropriate for a TKA, this test can give you a rough idea of your likely success rate’. You could put it out there before they even come to see you. ‘Is this operation for you?’ type of thing” (028)                                                                                                                                                                                                                                                                                            |   |
|               | Time would be a key concern to using a decision aid in my practice                                                                              | Barrier | “I just couldn’t use a tool that is going to take up more time. There is already so much demands on our time and there is not enough time as it is. So the tool may only take 5 minutes but then you add 4, 5, 6 patients and that is half an hour extra of your time that you didn’t have” (022)<br><br>“It is frantic getting patients through and there is always that rush to see all the patients in a really short time and to spend 5-10 minutes to do a questionnaire with a patient... it is hard to justify that. But if there was something validated and it was done as a routine process, the patient came in with a form filled out with a score that would be really nice” (016) | 6 |
| Reinforcement | Evidence that tool had been widely validated would not convince me to use it. I would need to correlate it with my own clinical decision making | -*      | “I never trust evidence because you only have to go to Dr x ... even in research, there is a lot of doubtful stuff. You’ve got to be careful about basing something totally on results. I know we have got to be evidenced-based but the evidence may apply to a certain situation in a certain individual at a period in time and there is always variations or exceptions around that. So I would try and correlate them in my own mind and if after a while I am seeing well that person is a bit odd                                                                                                                                                                                        | 9 |

1  
2  
3  
4  
5  
6  
7  
8  
9  
10  
11  
12  
13  
14  
15  
16  
17  
18  
19  
20  
21  
22  
23  
24  
25  
26  
27  
28  
29  
30  
31  
32  
33  
34  
35  
36  
37  
38  
39  
40  
41  
42  
43  
44  
45  
46  
47  
48  
49

|       |                                                                              |             |                                                                                                                                                                                                                                                                                                                                                                                                                                                                                                                                                                  |    |
|-------|------------------------------------------------------------------------------|-------------|------------------------------------------------------------------------------------------------------------------------------------------------------------------------------------------------------------------------------------------------------------------------------------------------------------------------------------------------------------------------------------------------------------------------------------------------------------------------------------------------------------------------------------------------------------------|----|
|       |                                                                              |             | and they are scoring badly on the aid, well ok, this has legs.” (010)<br><br>“I trust [the research] but I want my data no doubt about it because I think I am better... I know lots of faults in techniques or little things that really can comprise outcome. So everyone has a different hand and surgery is very touchy practice.... So I believe what happens around but at the same time I want mine as well because I know what I do differently or I am more careful about” (013)                                                                        |    |
|       | I would be more likely to trust a tool developed and implemented by my peers | Facilitator | “If a decision aid is implemented and I see my colleagues implementing it and it is working in their hands then possibly that would convince me” (024)<br><br>“I think people are mistrustful of things that come out of other institutions but I would trust that a study from [the Department] would be a rigorous design. Where people are invested in something, they’re much more likely to use it. If the results showed an aid was valid, I guess I would be prepared to try it and see whether I thought it was valid in my hands, in my practice” (026) | 4  |
| Goals | My goal is to optimise patient outcomes                                      | Facilitator | “Certainly, surgeons want results. If you say you are going to reduce our risk, then why wouldn’t we be happy with that” (012)                                                                                                                                                                                                                                                                                                                                                                                                                                   | 20 |

\* (-) donates that the belief may be either a facilitator or barrier depending on how an aid is implemented

Additional file 1. Theoretical Domains Framework definitions for coding (adapted from Cane et al. 2012)

| TDF Domain                               | Description                                                                                                                                                                                                                                                                                                                                                                            |
|------------------------------------------|----------------------------------------------------------------------------------------------------------------------------------------------------------------------------------------------------------------------------------------------------------------------------------------------------------------------------------------------------------------------------------------|
| Knowledge                                | <p><i>An awareness of the existence of something</i></p> <ul style="list-style-type: none"> <li>- Awareness of scientific rationale regarding patients at risk of no clinically meaningful improvement from surgery</li> <li>- Awareness of own percentage of patients who don't respond</li> <li>- Awareness of decision aids to assist in identifying surgical candidates</li> </ul> |
| Skills                                   | <p><i>An ability or proficiency acquired through practice</i></p> <ul style="list-style-type: none"> <li>- Ability required/acquired through practice/experience to help decide if a patient is likely to benefit from surgery or not</li> <li>- Use of tool to assist in identifying suitable candidates for surgery</li> </ul>                                                       |
| Social/<br>Professional<br>role/identity | <p><i>A coherent set of behaviours and displayed personal qualities of an individual in a social or work setting</i></p> <ul style="list-style-type: none"> <li>- Surgeons' expressions about their own professional identity/job/role/professional boundaries when managing a person at high risk of no clinically meaningful improvement</li> </ul>                                  |
| Beliefs about<br>capabilities            | <p><i>Acceptance of the truth, reality or validity about an ability, talent or facility that a person can put to constructive use</i></p> <ul style="list-style-type: none"> <li>- The surgeon's confidence that they can identify patients at risk of no clinically meaningful improvement and can employ the skills needed to refuse to operate on the patients</li> </ul>           |
| Optimism                                 | <p><i>The confidence that things will happen for the best, of that desired goals will be attained</i></p> <ul style="list-style-type: none"> <li>- The confidence expressed that a decision aid will reduce the rate of surgery in patients at high risk of no clinically meaningful improvement</li> </ul>                                                                            |
| Beliefs about<br>consequences            | <p><i>Acceptance of the truth, reality or validity about outcomes of a behaviour in a given situation</i></p> <ul style="list-style-type: none"> <li>- Perceptions about outcomes, advantages and disadvantages of using a decision aid</li> <li>- Any legal or ethical concerns about using a decision aid</li> </ul>                                                                 |
| Reinforcement                            | <p><i>Increasing the probability of a response by arranging a dependent relationship, or contingency, between the response and a given stimulus</i></p> <ul style="list-style-type: none"> <li>- What incentives would influence the surgeon using a decision aid</li> </ul>                                                                                                           |
| Intentions                               | <p><i>A conscious decision to perform a behaviour or a resolve to act in a certain way</i></p> <ul style="list-style-type: none"> <li>- Intentions to use a decision aid</li> </ul>                                                                                                                                                                                                    |
| Goals                                    | <p><i>Mental representation of outcomes or end states that an individual wants to achieve</i></p>                                                                                                                                                                                                                                                                                      |
| Memory,<br>attention and<br>decision     | <p><i>The ability to retain information, focus selectively on aspects of the environment and choose between two or more alternatives</i></p> <ul style="list-style-type: none"> <li>- The processes involved and factors taken into account when the</li> </ul>                                                                                                                        |

|                                                          |                                     |                                                                                                                                                                                                                                                                                                                                                                                                                                                                                                                                                                                  |
|----------------------------------------------------------|-------------------------------------|----------------------------------------------------------------------------------------------------------------------------------------------------------------------------------------------------------------------------------------------------------------------------------------------------------------------------------------------------------------------------------------------------------------------------------------------------------------------------------------------------------------------------------------------------------------------------------|
| 1<br>2<br>3<br>4<br>5<br>6<br>7                          | processes                           | <p>surgeon makes decisions about whether to operate or not</p> <ul style="list-style-type: none"> <li>- If the surgeon surgical decision making will be influenced by the decision aid</li> <li>- Surgeon's perceptions of acceptable levels of risk</li> </ul>                                                                                                                                                                                                                                                                                                                  |
| 8<br>9<br>10<br>11<br>12<br>13<br>14<br>15<br>16<br>17   | Environmental context and resources | <p><i>Any circumstance of a person's situation or environment that discourage or encourage the development of skills and abilities, independence, social competence and adaptive behaviour</i></p> <ul style="list-style-type: none"> <li>- Availability of, and confidence in, non-operative alternatives</li> <li>- Public versus private differences</li> <li>- How a decision aid might best be packaged/implemented</li> <li>- Attitudes towards mandating use of a decision aid</li> <li>- How surgeons can agree on level of acceptable risk with decision aid</li> </ul> |
| 18<br>19<br>20<br>21<br>22<br>23<br>24<br>25<br>26<br>27 | Social influences                   | <p><i>Those interpersonal processes that can cause an individual to change their thoughts, feelings or behaviours</i></p> <ul style="list-style-type: none"> <li>- The influences that other surgeons have on surgeon decision to operate or not</li> <li>- The influences patients have on surgeon decision to operate or not</li> <li>- How the surgeon believes patients might respond to the use of a decision aid</li> </ul>                                                                                                                                                |
| 28<br>29<br>30<br>31<br>32<br>33                         | Emotion                             | <p><i>A complex reaction pattern, involving experiential, behavioural and physiological elements, by which the individual attempts to deal with a personally significant matter or event</i></p> <ul style="list-style-type: none"> <li>- The emotional responses of the surgeon to using a decision aid</li> </ul>                                                                                                                                                                                                                                                              |
| 34<br>35<br>36<br>37<br>38<br>39<br>40                   | Behavioural regulation              | <p><i>Anything aimed at managing or changing objectively observed or measured actions</i></p> <ul style="list-style-type: none"> <li>- Consistency of decisions to operate or not in patients at high risk of not responding</li> <li>- Processes that help regulate behaviour</li> </ul>                                                                                                                                                                                                                                                                                        |

## SUPPLEMENT 1: COREQ 32-ITEM CHECKLIST

Tong A, Sainsbury P, Craig J. (2007) Consolidated criteria for reporting qualitative research (COREQ): a 32-item checklist for interviews and focus groups. *International Journal for Quality in Healthcare*: 19:349 – 357

| No. Item                                      | Guide questions/description                                              | Reported on Page # |
|-----------------------------------------------|--------------------------------------------------------------------------|--------------------|
| Domain 1: Research team and reflexivity       |                                                                          |                    |
| 1. Inter viewer/facilitator                   | Which author/s conducted the interview?                                  | 7                  |
| 2. Credentials                                | What were the researcher's credentials?                                  | 7                  |
| 3. Occupation                                 | What was their occupation at the time of the study?                      | 7                  |
| 4. Gender                                     | Was the researcher male or female?                                       | 7                  |
| 5. Experience and training                    | What experience or training did the researcher have?                     | 7                  |
| 6. Relationship with participants established | Was a relationship established prior to study commencement?              | 7                  |
| 7. Participant knowledge of the interviewer   | What did the participants know about the researcher?                     | 7                  |
| 8. Interviewer characteristics                | What characteristics were reported about the inter viewer/facilitator?   | 7                  |
| Domain 2: study design                        |                                                                          |                    |
| 9. Methodological orientation and Theory      | What methodological orientation was stated to underpin the study?        | 8                  |
| 10. Sampling                                  | How were participants selected?                                          | 6                  |
| 11. Method of approach                        | How were participants approached?                                        | 6                  |
| 12. Sample size                               | How many participants were in the study?                                 | 10                 |
| 13. Non-participation                         | How many people refused to participate or dropped out? Reasons?          | 10                 |
| 14. Setting of data collection                | Where was the data collected?                                            | 7                  |
| 15. Presence of non-participants              | Was anyone else present besides the participants and researchers?        | 7                  |
| 16. Description of sample                     | What are the important characteristics of the sample?                    | 10                 |
| 17. Interview guide                           | Were questions, prompts, guides provided by the authors?                 | Table 1            |
| 18. Repeat interviews                         | Were repeat interviews carried out?                                      | 7                  |
| 19. Audio/visual recording                    | Did the research use audio or visual recording to collect the data?      | 7                  |
| 20. Field notes                               | Were field notes made during and/or after the inter view?                | 7                  |
| 21. Duration                                  | What was the duration of the interviews                                  | 7                  |
| 22. Data saturation                           | Was data saturation discussed?                                           | 7                  |
| 23. Transcripts returned                      | Were transcripts returned to participants for comment and/or correction? | 8                  |
| Domain 3: analysis and findings               |                                                                          |                    |
| 24. Number of data coders                     | How many data coders coded the data?                                     | 8, 9               |
| 25. Description of the coding tree            | Did authors provide a description of the coding tree?                    | Additional file 1  |
| 26. Derivation of themes                      | Were themes identified in advance or derived from the data?              | 8, 9               |
| 27. Software                                  | What software, if applicable, was used to                                | 9                  |



|                                  |                                                                                                         |            |
|----------------------------------|---------------------------------------------------------------------------------------------------------|------------|
|                                  | manage the data?                                                                                        |            |
| 28. Participant checking         | Did participants provide feedback on the findings?                                                      | 8          |
| 29. Quotations presented         | Were participant quotations presented to illustrate the themes/findings? Was each quotation identified? | 11-22      |
| 30. Data and findings consistent | Was there consistency between the data presented and the findings?                                      | 11-22      |
| 31. Clarity of major themes      | Were major themes clearly presented in the findings?                                                    | 11-22      |
| 32. Clarity of minor themes      | Is there a description of diverse cases or discussion of minor themes?                                  | 19, 22, 23 |

# BMJ Open

## Barriers and facilitators to Orthopaedic Surgeons' uptake of decision aids for Total Knee Arthroplasty: A qualitative study

|                                 |                                                                                                                                                                                                                                                                                                                                                                                                                                                                                                                                                                                                                                                |
|---------------------------------|------------------------------------------------------------------------------------------------------------------------------------------------------------------------------------------------------------------------------------------------------------------------------------------------------------------------------------------------------------------------------------------------------------------------------------------------------------------------------------------------------------------------------------------------------------------------------------------------------------------------------------------------|
| Journal:                        | <i>BMJ Open</i>                                                                                                                                                                                                                                                                                                                                                                                                                                                                                                                                                                                                                                |
| Manuscript ID                   | bmjopen-2017-018614.R1                                                                                                                                                                                                                                                                                                                                                                                                                                                                                                                                                                                                                         |
| Article Type:                   | Research                                                                                                                                                                                                                                                                                                                                                                                                                                                                                                                                                                                                                                       |
| Date Submitted by the Author:   | 09-Oct-2017                                                                                                                                                                                                                                                                                                                                                                                                                                                                                                                                                                                                                                    |
| Complete List of Authors:       | Bunzli, Samantha; The University of Melbourne, Department of Surgery, St Vincent's Hospital Melbourne<br>Nelson, Elizabeth ; St Vincent's Hospital, Melbourne, Department of Orthopaedics<br>Scott, Anthony; The University of Melbourne, Melbourne Institute of Applied Economic and Social Research<br>French, Simon; Queen's University, School of Rehabilitation Therapy; Monash University, School of Public Health and Preventive Medicine<br>Choong, Peter; University of Melbourne, Surgery; St Vincent's Hospital, Orthopaedics<br>Dowsey, Michelle; University of Melbourne, Department of Surgery, St Vincent's Hospital, Melbourne |
| <b>Primary Subject Heading</b>: | Evidence based practice                                                                                                                                                                                                                                                                                                                                                                                                                                                                                                                                                                                                                        |
| Secondary Subject Heading:      | Qualitative research                                                                                                                                                                                                                                                                                                                                                                                                                                                                                                                                                                                                                           |
| Keywords:                       | Knee < ORTHOPAEDIC & TRAUMA SURGERY, QUALITATIVE RESEARCH, Total Knee Arthroplasty, Decision aids, Implementation                                                                                                                                                                                                                                                                                                                                                                                                                                                                                                                              |
|                                 |                                                                                                                                                                                                                                                                                                                                                                                                                                                                                                                                                                                                                                                |

SCHOLARONE™  
Manuscripts

1  
2  
3 **1 Barriers and facilitators to Orthopaedic Surgeons' uptake of decision aids for Total**  
4 **2 Knee Arthroplasty: A qualitative study**  
5  
6 **3**

7 4 \* Samantha Bunzli. The University of Melbourne, Department of Surgery, St. Vincent's  
8 Hospital, Melbourne. Level 2, Clinical Sciences Building, 29 Regent street, Fitzroy 3065,  
9 Victoria, Australia. Email: sbunzli@unimelb.edu.au  
10 6

11 7  
12 8 Elizabeth Nelson. Department of Orthopaedics, St Vincent's Hospital. 41 Victoria  
13 Parade, Fitzroy, Melbourne 3065 Australia. Email: elizabeth.nelson@svha.org.au  
14 9

15 10  
16 11 Anthony Scott. Melbourne Institute of Applied Economic and Social Research, The  
17 University of Melbourne. Level 5, Faculty of Business and Economics Building, 111  
18 Barry Street, Melbourne 3010 Victoria, Australia. Email: a.scott@unimelb.edu.au  
19 14

20 15 Simon French. School of Rehabilitation Therapy, Faculty of Health Sciences, Louise D.  
21 Acton Building, Room 222. Queen's University, 99 University Ave, Kingston, ON K7L  
22 3N6. Canada. Email: simon.french@queensu.ca  
23 17

24 18  
25 19 Peter Choong. The University of Melbourne, Department of Surgery, St. Vincent's  
26 Hospital, Melbourne. Level 2, Clinical Sciences Building, 29 Regent street, Fitzroy 3065,  
27 Victoria, Australia. Email: pchoong@unimelb.edu.au  
28 21

29 22  
30 23 Michelle Dowsey. The University of Melbourne, Department of Surgery, St. Vincent's  
31 Hospital, Melbourne. Level 2, Clinical Sciences Building, 29 Regent street, Fitzroy 3065,  
32 Victoria, Australia. Email: mmdowsey@unimelb.edu.au  
33 25

34 26  
35 27  
36 28 \* Corresponding author  
37

38 29  
39  
40  
41  
42  
43  
44  
45  
46  
47  
48  
49  
50  
51  
52  
53  
54  
55  
56  
57  
58  
59  
60

1  
2  
3 **Abstract**  
4

5 *Objectives:* The demand for Total Knee Arthroplasty (TKA) is increasing. Differentiating  
6  
7  
8 who will derive a clinically meaningful improvement from TKA from others is a key  
9  
10  
11 challenge for Orthopaedic Surgeons. Decision aids can help surgeons select appropriate  
12  
13  
14 candidates for surgery, but their uptake has been low. The aim of this study was to  
15  
16 explore the barriers and facilitators to decision aid uptake among Orthopaedic Surgeons.

17  
18 *Design:* A qualitative study involving face-to-face interviews. Questions were  
19  
20  
21 constructed on the Theoretical Domains Framework to systematically explore barriers  
22  
23  
24 and facilitators. *Setting:* One tertiary hospital in Australia. *Participants:* Twenty  
25  
26  
27 Orthopaedic Surgeons performing TKA. *Outcome measures:* Beliefs underlying similar  
28  
29  
30 interview responses were identified and grouped together as themes describing relevant  
31  
32  
33 barriers and facilitators to uptake of decision aids. *Results:* While prioritising their  
34  
35  
36 clinical acumen, surgeons believed a decision aid could enhance communication and  
37  
38  
39 patient informed consent. Barriers identified included the perception that one's patient  
40  
41  
42 outcomes were already optimal; a perceived lack of non-operative alternatives for the  
43  
44  
45 management of end-stage osteoarthritis; concerns about mandatory cut-offs for patient-  
46  
47  
48 centred care, and concerns about the medico-legal implications of using a decision aid.

49  
50  
51 *Conclusions:* Multifaceted implementation interventions are required to ensure that  
52  
53  
54 Orthopaedic Surgeons are ready, willing and able to use a TKA decision aid.  
55  
56  
57 Audit/feedback to address current decision-making biases such as overconfidence may  
58  
59  
60 enhance readiness to uptake. Policy changes and/or incentives may enhance willingness  
to uptake. Finally, the design/implementation of effective non-operative treatments may

1  
2  
3 52 enhance ability to uptake by ensuring that surgeons have the resources they need to carry  
4  
5 53 out decisions.  
6  
7

8 54  
9

### 10 55 **Strengths and limitations of the study**

11  
12  
13 56 • Very few qualitative studies involving Orthopaedic Surgeons have been published  
14  
15 57 in the literature.

16  
17  
18 58 • This study took place in one of the largest arthroplasty clinics in Australia. All  
19  
20 59 twenty surgeons performing TKA in this hospital participated in a one-to-one  
21  
22 60 interview.

23  
24  
25 61 • A theoretical framework was used to systematically explore the barriers and  
26  
27 62 facilitators to uptake of a decision aid by Orthopaedic Surgeons.

28  
29  
30 63 • Consistent findings are documented between this single site study and international  
31  
32 64 surveys of surgeon' attitudes.

33  
34  
35 65 • Beliefs and attitudes are distinct from actual behaviour, and therefore the themes  
36  
37 66 elicited in this study do not provide evidence of the actual influences on uptake of a  
38  
39 67 decision aid.

40  
41 68  
42  
43  
44  
45  
46  
47  
48  
49  
50  
51  
52  
53  
54  
55  
56  
57  
58  
59  
60

## 69 Background

70 Up to one quarter of Total Knee Arthroplasties (TKA) are performed on inappropriate  
71 candidates according to evidence-based criteria<sup>1</sup> and a similar proportion experience  
72 minimal clinical benefit from surgery.<sup>2</sup> The rates of TKA are increasing<sup>3</sup>; differentiating  
73 who will derive a clinically meaningful improvement from TKA from others is a key  
74 challenge for Orthopaedic Surgeons. While the degree osteoarthritis (OA) severity, pain  
75 severity and the impact of pain, are key indicators for TKA, surgeons' consideration of  
76 other evidence-based indicators such as psychosocial factors remains varied<sup>4-6</sup>  
77 Observations of orthopaedic consultations suggest that other 'unstated factors' may also  
78 influence clinical judgments such as the surgeons' beliefs in their own ability to conduct  
79 surgery and their 'instincts' about the patients ability to cope with pain.<sup>7</sup>

80  
81 In recent years there has been a move towards a model of shared decision-making in  
82 Orthopaedics as part of informed consent.<sup>8,9</sup> This model implies that surgeons have a duty  
83 to inform patients about the benefits and harms of TKA and the likelihood of their  
84 occurrence, supporting them to arrive at an informed, shared decision. Evidence suggests  
85 that there is often a lack of time during the clinical encounter for patients to consider or  
86 discuss all available treatment options and arrive at a decision congruent with their own  
87 preferences.<sup>10</sup>

88  
89 To help address variations in clinical judgments and promote shared decision-making,  
90 decision aids may be useful.<sup>11,12</sup> Decision aids can be designed to estimate important,  
91 patient-specific risks of responding to surgery, based on independent prognostic

1  
2  
3 92 correlates of post-TKA response such as body mass index, degree of OA severity, pre-  
4  
5 93 operative pain, function and mental health.<sup>13</sup> Similar aids have been found to predict  
6  
7  
8 94 outcomes in other areas of medicine with superior accuracy to clinical judgments alone.<sup>14</sup>  
9  
10 95 <sup>15</sup> Decision aids have improved patient knowledge and confidence in decisions,<sup>16</sup> and  
11  
12 96 have even been found to reduce the rate of surgical procedures.<sup>17</sup>  
13  
14  
15 97  
16  
17 98 Orthopaedic Surgeons recognize the need for an aid to support their decision making for  
18  
19 99 TKA and optimize communication with patients.<sup>6 18</sup> However, the uptake of decision aids  
20  
21 100 amongst surgeons has been low.<sup>9</sup> A number of factors can influence uptake of a decision  
22  
23 101 aid, and the success of implementation efforts depends on the careful assessment of the  
24  
25 102 barriers to, and facilitators of, uptake.<sup>19</sup> The implementation literature advocates the use  
26  
27 103 of theory to ensure the systematic identification of such factors and inform the design of  
28  
29 104 interventions to address them.<sup>20</sup> Using theory not only assists in designing studies that  
30  
31 105 are better able to facilitate behavior change,<sup>21</sup> but also provides a basis for better  
32  
33 106 understanding the processes underpinning behavior change.<sup>22</sup> To date, studies of  
34  
35 107 decision-making amongst Orthopaedic Surgeons have been few and atheoretical<sup>6 7 23</sup> and  
36  
37 108 the barriers and facilitators of uptake of decision aids for TKA have not been rigorously  
38  
39 109 explored.<sup>9 18</sup>  
40  
41  
42  
43  
44  
45  
46  
47

## 111 **Methods**

### 113 **Aim and Design:**

114

1  
2  
3 115 This theoretically-informed qualitative study is the first phase of a wider project seeking  
4  
5 116 to design and implement a decision aid into an Australian Orthopaedic clinic setting. The  
6  
7  
8 117 aim of this study was to explore the barriers and facilitators to uptake of a TKA decision  
9  
10 118 aid through structured one-to-one interviews with Orthopaedic Surgeons.  
11  
12

13 119

14  
15 120 **Participants:**

16  
17 121

18  
19  
20 122 All Orthopaedic Surgeons and Registrars performing TKA at one tertiary teaching  
21  
22 123 hospital in Australia were eligible. Eligible candidates received the study details via  
23  
24 124 email from an institutional administration officer, and were invited to contact the  
25  
26  
27 125 researchers to arrange an interview at a time and place suitable to them.  
28

29 126

30  
31 127 **Data collection:**

32 128

33  
34  
35  
36 129 The Theoretical Domains Framework (TDF)<sup>24</sup> was selected as a comprehensive and  
37  
38 130 validated framework for determining barriers and facilitators related to the  
39  
40 131 implementation of best practice and clinicians' behavior change. The TDF was developed  
41  
42 132 by implementation scientists to synthesise existing behavior change theories into a single  
43  
44 133 framework. A six-stage consensus approach resulted in the identification of 12 theoretical  
45  
46 134 'domains' describing possible mediators of behavior change.<sup>24</sup> A subsequent validation  
47  
48 135 study<sup>22</sup> revised the original TDF to 14 domains: Knowledge; Skills; Social/professional  
49  
50 136 role and identity; Beliefs about capabilities; Optimism; Beliefs about consequences;  
51  
52  
53 137 Reinforcement; Intentions; Goals; Memory, attention and decision processes;  
54  
55  
56  
57  
58  
59  
60



1  
2  
3 138 Environmental context and resources, Social influences; Emotions; and Behavioural  
4  
5 139 regulation. The revised TDF, used in this study, has explained implementation problems  
6  
7  
8 140 and informed the development of theory-informed behavior change interventions.<sup>25-27</sup>  
9

10 141

11  
12 142 Interview questions were developed for each domain of the TDF with the advice of  
13  
14  
15 143 content experts in the TDF (SF), orthopaedic surgery (MD) and decision-making  
16  
17 144 processes (AS), and in consultation with the literature.<sup>28</sup> Interviews were prefaced by  
18  
19  
20 145 stating that the researchers planned to develop a decision aid, thus the discussion was  
21  
22 146 centered around a hypothetical decision aid rather than a defined one. In the first part of  
23  
24  
25 147 the interview, questions aimed to elicit current decision-making processes and biases. In  
26  
27 148 the second part, questions aimed to identify beliefs and attitudes towards decision aids  
28  
29 149 and factors that may influence decisions to use one. Table 1 presents the interview  
30  
31 150 schedule.

32  
33  
34 151

35  
36 152 [Insert Table 1]

37  
38  
39 153

40  
41 154 The interviewer (SB), a female post-doctoral researcher with methodological expertise in  
42  
43 155 qualitative research, had no previous relationship with the participants and no affiliation  
44  
45  
46 156 with the hospital. Data saturation was considered complete when the beliefs and attitudes  
47  
48 157 of all 20 surgeons working in this setting had been elicited. Face-to-face interviews were  
49  
50 158 conducted with 18 participants in a private office; phone interviews were conducted with  
51  
52  
53 159 two participants. Interviews lasted 20-30 minutes. Nineteen interviews were audio  
54  
55 160 recorded and transcribed verbatim. One participant did not wish the interview to be  
56  
57  
58  
59  
60

1  
2  
3 161 recorded, therefore hand-written notes were made during the interview. Participant  
4  
5 162 anonymity was ensured at all times. All transcripts were de-identified prior to data  
6  
7  
8 163 analysis. All participants had the opportunity to review the study findings during a  
9  
10 164 presentation at a scheduled surgical meeting. There was consensus agreement with the  
11  
12 165 researchers' interpretations and no adjustments were made to the study themes.  
13  
14  
15 166

167 **Analysis:**

168  
169 Adopting an implementation approach,<sup>26</sup> three stages of data analysis were conducted. In  
170 the first stage, two researchers (SB, EN) independently coded interview transcripts by  
171 classifying each interview response or utterance into one of the 14 TDF domains. For  
172 example, the response "I think 22 per cent is the high end. But there are a lot of different  
173 papers that all suggest 10, 15, 20 per cent", was classified into the 'Knowledge' domain  
174 of the TDF. Definitions for each domain were derived from the literature<sup>19</sup> and adapted to  
175 the study context. Pilot coding was performed in which the two researchers  
176 independently coded two transcripts. Inter-coder comparisons resulted in refinement of  
177 domain definitions (see Additional file 1). This process was conducted three times, until  
178 the two researchers were confident that all relevant interview responses could be clearly  
179 coded into one domain. The two researchers then independently coded all 20 transcripts.  
180 Disagreements were discussed and consensus reached in each instance. Coded responses  
181 were uploaded into a qualitative data sorting software (Codesort<sup>29</sup>) to facilitate further  
182 analysis.

183  
184  
185  
186  
187  
188  
189  
190  
191  
192  
193  
194  
195  
196  
197  
198  
199  
200

1  
2  
3 184 In the second stage of analysis, one researcher (SB) generated 'belief statements' based  
4  
5 185 on the coded interview responses. For example, from the response: "I think 22 per cent is  
6  
7 186 the high end. But there are a lot of different papers that all suggest 10, 15, 20 per cent"  
8  
9 187 classified in the 'Knowledge' domain, we generated the belief statement: 'I am aware of  
10  
11 188 the literature that up to 20 per cent of patients do not have a clinically meaningful  
12  
13 189 improvement from TKA'. Belief statements were worded such that they could describe  
14  
15 190 similar responses from different participants. Belief statements were reviewed by two  
16  
17 191 further researchers (EN, MD), before being interpreted as a likely 'facilitator' or 'barrier'  
18  
19 192 to surgeon's uptake of a decision aid. Continuing the example above, the belief  
20  
21 193 statement: 'I am aware of the literature that up to 20 per cent of patients do not have a  
22  
23 194 clinically meaningful improvement from TKA' was interpreted as a facilitator to uptake,  
24  
25 195 in that we considered surgeons would be more likely to use a decision aid if they were  
26  
27 196 aware that a substantial proportion of TKA's resulted in suboptimal outcomes.  
28  
29  
30  
31  
32  
33

34 197

35  
36 198 In the third stage of analysis, we identified the domains most likely to influence  
37  
38 199 surgeon's behaviour (i.e. using a decision aid or not). This was determined by: 1.  
39  
40 200 Frequency of beliefs across transcripts and 2. The perceived strength of beliefs in  
41  
42 201 influencing behaviour. To illustrate, the belief statement: 'I think that the percentage of  
43  
44 202 my patients who achieve clinically meaningful improvement is higher than that reported  
45  
46 203 in the literature' appeared in 17/20 transcripts and was considered to have a strong  
47  
48 204 influence on whether a surgeon would use a decision aid or not, implying that behaviour  
49  
50 205 change (i.e. using a decision aid) was unlikely if surgeons considered that their patients'  
51  
52 206 outcomes were already optimised. 'Knowledge' was therefore identified as a relevant  
53  
54  
55  
56  
57  
58  
59  
60

1  
2  
3 207 domain. Where the researchers considered that beliefs within and between domains  
4  
5 208 represented similar barriers/facilitators, these were grouped into themes. We present  
6  
7  
8 209 frequencies of beliefs (see Table 2) to provide the reader with a better understanding of  
9  
10 210 the range of interview responses and to assist us in identifying 'relevant' domains of the  
11  
12 211 TDF. However, readers should be cognisant that the absence of a belief in a transcript is  
13  
14  
15 212 not the same as a lack of endorsement.  
16  
17  
18 213

## 20 214 **Results**

### 21 215 22 216 **Participants:**

23  
24  
25 217  
26  
27 218 Aggregate data describing the demographics of the sample is provided to protect  
28  
29 219 individual anonymity. The sample comprised of 15 Consultant surgeons and five  
30  
31 220 Registrars. The surgeons' total experience performing TKA ranged from six months to 30  
32  
33 221 years (mean  $\pm$  SD, 12.9  $\pm$  9.3) and the number of TKAs performed each month ranged  
34  
35 222 from less than one to 12 (mean  $\pm$  SD, 5.9  $\pm$  3.0).  
36  
37  
38  
39  
40  
41  
42  
43

### 44 224 ***Relevant domains***

45  
46 225 Across the 20 interview transcripts, 628 utterances were coded into the 14 domains.  
47  
48 226 Eleven domains of the TDF were identified as relevant: Knowledge; Behavioural  
49  
50 227 regulation; Memory attention and decision processes; Beliefs about capabilities; Skills;  
51  
52 228 Goals; Social/Professional role and identity; Intention; Beliefs about consequences;  
53  
54  
55  
56  
57  
58  
59  
60

1  
2  
3 229 Environmental context; and Reinforcement. Table 2 presents the relevant domains, with  
4  
5 230 specific belief statements supported by example quotes.  
6  
7

8 231

9  
10 232 [Insert Table 2]  
11

12 233

13  
14  
15 234 The seven themes are described below, illustrated by interview extracts found in Table 3  
16  
17 235 and denoted in the text as 'Quote' numbers e.g. Q1  
18

19 236

20  
21  
22 237 [Insert Table 3]  
23

24 238

25  
26  
27 239 ***Themes identified:***

28  
29 240 1. Knowledge of one's own patient outcomes  
30

31  
32 241 (Relevant TDF domains: Goals; Knowledge; Behavioural regulation; and Beliefs about  
33  
34 242 capabilities)  
35

36 243

37  
38  
39 244 The goal of all participations was to optimise outcomes for their patients (Q1). While  
40  
41 245 almost all participants (n=19) were aware of the literature that up to 20 per cent of  
42  
43 246 patients undergoing TKA have no clinically meaningful improvement from surgery, most  
44  
45 247 believed that this percentage was significantly lower in the patients they operated on  
46  
47 248 (Q2). All participants based this estimation on patient presentations at post-surgical  
48  
49 249 follow-up appointments. However participants acknowledged the 'rose-coloured glasses'  
50  
51 250 they saw their patients through, citing the subtleties of rapport that made patients less  
52  
53 251 likely to report dissatisfaction with surgery (Q3).  
54  
55  
56  
57  
58  
59  
60

1  
2  
3 252  
4  
5

6 253 It was also recognised that patients with poor post-surgical outcomes may be less likely  
7  
8 254 to attend follow-up appointments, choosing to seek care elsewhere. Participants believed  
9  
10 255 that tracking long-term patient outcomes through an existing joint registry could counter-  
11  
12 256 act this (Q4, Q5).  
13

14  
15 257  
16

17 258 However, a key problem identified by many participants was how to define clinically  
18  
19 259 meaningful improvement. Seven surgeons emphasised the importance of ‘asking the right  
20  
21 260 question in the right way’ (Q6, Q7). The discrepancy between surgeons’ perception of  
22  
23 261 clinically meaningful improvement and that of their patients was commonly attributed to  
24  
25 262 mis-matched surgeon-patient pre-surgical expectations of TKA. Surgeons reported their  
26  
27 263 expectations of TKA to be a resolution of joint pathology with some corresponding  
28  
29 264 improvement in pain. While disease and pain severity were key considerations in surgical  
30  
31 265 decision-making, all participants acknowledged that patient expectations were important  
32  
33 266 (Q8, Q9).  
34  
35  
36  
37  
38

39 267  
40

## 41 268 2. Reliance on ‘clinical intuition’

42  
43 269 (Relevant TDF domains: Memory, attention and decision processes; and Skills)  
44  
45  
46 270  
47

48 271 The accurate assessment of patient expectations presented a challenge for many surgeons.  
49

50 272 While the physical aspects of the clinical assessment were routine skills that all  
51  
52 273 participants believed they had mastered well, many junior and senior surgeons reported  
53  
54 274 difficulties assessing the psychological aspects of the patients’ presentation (Q10).  
55  
56  
57  
58  
59  
60

1  
2  
3 275  
4

5 276 Only a few participants were aware of any validated tools to assess pre-surgical patient  
6  
7  
8 277 predictive factors. One participant had prior knowledge of a decision aid but had not  
9  
10 278 used it. None of the other participants were aware of any decision aid for TKA.  
11  
12 279 Participants relied on their ‘clinical intuition’ for patients who were less likely to do well.  
13  
14  
15 280 A ‘gut-feeling’ for patients was developed with experience, over time (Q11).  
16  
17

18 281

19  
20 282 3. The role of aids in supporting clinical decision-making

21  
22 283 (Relevant TDF domains: Intention; Reinforcement)  
23  
24

25 284

26  
27 285 Fifteen of the participants believed an aid would support decision-making, like a  
28  
29 286 ‘barometer’ or weather app to forecast outcomes, particularly in patients they were  
30  
31 287 unsure about (Q12, Q13). However, most participants (n=13) believed an aid would be  
32  
33 288 insensitive to nuances at an individual level and could therefore not replace their clinical  
34  
35 289 acumen (Q14).  
36  
37

38  
39 290

40  
41 291 All participants expected to be provided with evidence that a decision aid had been  
42  
43 292 rigorously validated and shown to have high specificity and sensitivity before considering  
44  
45 293 using it. Participants were more likely to trust this evidence if it came from their own  
46  
47 294 institution (Q15). However, half of the participants reported that evidence supporting the  
48  
49 295 validity of a decision aid would not be sufficient to convince them to use it. Instead they  
50  
51 296 would need to see how the tool correlated with their own clinical decision-making (Q16).  
52  
53

54  
55 297  
56  
57  
58  
59  
60

1  
2  
3 298 4. Implications of a decision aid for patient-surgeon communication and shared decision-  
4  
5 299 making

6  
7  
8 300 (Relevant TDF domains: Beliefs about consequences; Memory, attention and decision  
9  
10 301 processes)

11  
12 302

13  
14  
15 303 Nine participants perceived that a decision aid would give them an evidence-based  
16  
17 304 approach for saying 'no' to patient, particularly for those participants who reported  
18  
19 305 difficulty declining for surgery (Q17). Many participants (n=10) believed an aid could be  
20  
21 306 an important component of patient informed consent, providing patients with objective  
22  
23 307 data on their likely risk outcomes, enabling them to have the appropriate expectations to  
24  
25 308 weigh up the risk and benefits of surgery for themselves. In this way, a decision aid was  
26  
27 309 seen as a valuable support to shared decision-making (Q18).  
28  
29  
30  
31

32 310

33  
34 311 When asked how they would feel about operating if a decision aid predicted a patient had  
35  
36 312 a 50 per cent chance of not responding to TKA, surgeons were divided in their responses.

37  
38 313 While eleven believed that decisions to proceed would need to be shared with the patient  
39  
40 314 (Q19), eight reported they would not consider surgery unless there was a greater than 80

41  
42 315 per cent chance the patient would respond (Q20).  
43  
44  
45

46 316

47  
48 317 5. Ethical and legal concerns about decision aids

49  
50 318 (Relevant TDF domain: Beliefs about consequences)

51  
52 319  
53  
54  
55  
56  
57  
58  
59  
60



1  
2  
3 320 Eight participants had medico-legal concerns about documenting a specific risk value in  
4  
5 321 patient records, with a few believing that such information would have to be deliberately  
6  
7 322 withheld from patients in the case it fell into the 'wrong' hands (Q21). While some  
8  
9 323 participants believed it would be unethical *not* to use a decision aid if it had been shown  
10  
11 324 to improve patient outcomes, others were concerned about the ethical implications of a  
12  
13 325 tool if imposed cut-offs were used to deny patients surgery (Q22, Q23).  
14  
15  
16  
17  
18  
19

20 327 6. Available resources and organisational culture as barriers to uptake  
21

22 328  
23  
24 329 (Relevant TDF domains: Environmental context and resources; Beliefs about  
25  
26 330 consequences and Social/Professional role and identity)  
27  
28

29 331  
30  
31 332 Almost all participants expressed concerns about making an aid compulsory and  
32  
33 333 imposing mandatory cut-off levels. While many recognised that implementing the tool in  
34  
35 334 this way would have the potential to improve the use of valuable health resources and  
36  
37 335 save costs (Q24), several participants commented that mandatory cut-offs would only be  
38  
39 336 possible if an effective, non-operative alternative was made available for patients that  
40  
41 337 were denied surgery. The existing lack of effective alternative to surgery was seen as a  
42  
43 338 key barrier (Q25).  
44  
45  
46  
47

48 339  
49  
50 340 There was widespread agreement amongst surgeons (n=17) that the logistics of agreeing  
51  
52 341 on a cut-off value for acceptable risk, and the threat to surgeons' professional identity as  
53  
54  
55  
56  
57  
58  
59  
60

1  
2  
3 342 a patient-centred practitioner, were insurmountable barriers to imposing mandatory cut-  
4  
5 343 offs (Q26, Q27).  
6  
7

8 344

9  
10 345 7. Format and content of a decision aid  
11

12 346 (Relevant TDF domain: Environmental context and resources)  
13

14 347

15  
16  
17 348 Finally, physically integrating an aid into clinical practice was not seen as a key barrier to  
18  
19 349 implementation. An electronic or online format was seen as the most likely way an aid  
20  
21 350 could be implemented, particularly given the strict time constraints placed on outpatient  
22  
23 351 clinics (Q28).  
24  
25  
26

27 352

28  
29 353 Most believed that an aid would be best used within the patient-surgeon consultation  
30  
31 354 (Q29, Q30), while a couple suggested that an aid could be designed for patients to  
32  
33 355 use on their own or with a support network to save time in the clinical consultation  
34  
35 356 (Q31, Q32).  
36  
37

38 357

39  
40  
41 358 ***Irrelevant domains:***  
42

43 359 Three domains did not appear to have a salient influence on the target behaviour. These  
44  
45 360 were: Optimism, Emotion and Social Influences. Optimism was closely connected to the  
46  
47 361 domain Reinforcement i.e. surgeons reported being neither optimistic nor pessimistic  
48  
49 362 about the utility of an aid until they had seen evidence of its effectiveness. The Emotion  
50  
51 363 domain did not appear relevant as described by one surgeon: “I am not worried about the  
52  
53 364 implications of a tool. TKA is wellness surgery, in the worst case scenario they don't get  
54  
55  
56  
57  
58  
59  
60

1  
2  
3 365 a new knee". The Social Influence of patients did not appear relevant as surgeons  
4  
5 366 believed patients were accustomed to filling out questionnaires. While surgeons were  
6  
7  
8 367 more likely to trust an aid if it had been developed by their peers, they preferred to test  
9  
10 368 the tool 'in their own hands' and therefore the Social Influences of other surgeons using  
11  
12  
13 369 an aid appeared limited.

14  
15 370

## 17 371 **Discussion**

18  
19  
20 372

21  
22 373 These findings have implications for the future design and implementation of decision  
23  
24 374 aids into surgical clinical practice. It is possible that current decision-making biases may  
25  
26  
27 375 be key barriers to uptake. Surgical decision-making involves the consideration of the  
28  
29 376 risks versus benefits of surgery.<sup>30</sup> In this study, participants expressed confidence in their  
30  
31 377 ability to successfully remove diseased tissue and correct joint deformity, and the  
32  
33  
34 378 likelihood of some corresponding improvement in pain severity was perceived to be high.  
35  
36 379 At the same time, participants perceived that the risk their patients would not respond to  
37  
38  
39 380 TKA was low. One potential explanation for this is an apparent lack of clarity around the  
40  
41 381 definition of 'clinically meaningful improvement' and 'non-response'. The literature  
42  
43 382 suggests that patients' perceptions of 'clinically meaningful improvement' depend on  
44  
45  
46 383 their satisfaction with improvements in pain and function, closely linked to their  
47  
48 384 expectations of surgery.<sup>31</sup> In contrast, the surgeons in this study believed that a resolution  
49  
50 385 in joint pathology and some corresponding improvement pain could be considered  
51  
52  
53 386 'meaningful improvement'. This lack of clarity is important, as surgeons who believe that  
54  
55  
56 387 their patient outcomes are already optimised may be less motivated to use a decision aid.  
57  
58  
59  
60

1  
2  
3 388  
4  
5  
6

7 389 Another explanation may be that surgeons in this sample exhibited an over-confidence  
8 390 bias. Indeed, most participants believed their own patient outcomes were better than that  
9  
10 391 reported in the literature. While it is possible that this belief is accurate and outcomes  
11  
12 392 amongst this sample of surgeons are indeed above average, similar observations were  
13  
14 393 made in a survey study involving 700 Orthopaedic Surgeons in Europe and North  
15  
16 394 America.<sup>32</sup> In that study, 83 per cent of surgeons surveyed considered themselves to be  
17  
18 395 above average diagnosticians; 74 per cent believed they were above average surgeons and  
19  
20 396 25 per cent believed they were in the top five per cent of surgeons.<sup>32</sup> This over-  
21  
22 397 confidence bias may lead to a confirmation bias in which surgeons only notice things that  
23  
24 398 agree with their point of view and are less attentive to alternative viewpoints due to  
25  
26 399 cognitive dissonance.<sup>33</sup> A confirmation bias can have consequences for the uptake of a  
27  
28 400 decision aid as surgeons may be less likely to consider evidence that contradicts their  
29  
30 401 clinical experience.  
31  
32  
33  
34  
35

36 402  
37  
38

39 403 Surgical decision-making also involves weighing up of the risks versus benefits of non-  
40  
41 404 operative interventions.<sup>30</sup> The participants highlighted a lack of effective non-operative  
42  
43 405 interventions for end-stage knee OA. A study among Dutch Orthopaedic Surgeons  
44  
45 406 similarly documented a lack of confidence in the efficacy of non-surgical treatments  
46  
47 407 associated with a decreased referral rate.<sup>34</sup> Indeed, there is currently a dearth of evidence-  
48  
49 408 based, non-operative interventions for patients with end-stage knee OA either as an  
50  
51 409 alternative to surgery or as a definitive management when the patient is deemed  
52  
53 410 unsuitable for TKA. In the absence of a treatment alternative, surgery with all its risks  
54  
55  
56  
57  
58  
59  
60

1  
2  
3 411 and costs is often the default intervention. This is an important barrier to uptake as  
4  
5 412 evidence suggests surgeons will not use an aid if they do not have the resources to carry  
6  
7  
8 413 out the decisions,<sup>28</sup> or if the aid does not support their own view about effective  
9  
10 414 treatments.<sup>35</sup>

11  
12 415

13  
14  
15 416 The participants in this study believed a decision aid could promote shared decision-  
16  
17 417 making and enhance informed consent for TKA. Similar attitudes towards decision aids  
18  
19  
20 418 were identified in a previous review<sup>9</sup> and a survey of the wider population of Orthopaedic  
21  
22 419 Surgeons.<sup>18</sup> It may be that surgeons can be motivated to uptake a decision aid because it  
23  
24 420 is the ethical thing to do.<sup>36</sup> However, our study identified concerns about the ethical  
25  
26 421 implications of imposing mandatory cut-offs that would determine eligibility for TKA.  
27  
28 422 These concerns may reflect the participants' desire to defend professional discretion and  
29  
30 423 autonomy. We take the opportunity to emphasise the function of a decision aid is to  
31  
32 424 support, not replace, clinical decision making. However, concerns were also expressed  
33  
34 425 about the legal implications of using a decision aid. This finding contrasts with a study  
35  
36 426 involving US Orthopaedic Surgeons who believed decision aids may reduce litigation  
37  
38 427 and malpractice insurance premiums by enhancing shared decision-making.<sup>37</sup> It may be  
39  
40 428 that these concerns are unique to the medico-legal context of Australia. Certainly,  
41  
42 429 surgeons will be less likely to be uptake a tool if they perceive it makes them vulnerable  
43  
44  
45  
46  
47 430 to medico-legal action.

48  
49  
50 431

51  
52  
53 432 **Implications:**

54  
55 433  
56  
57  
58  
59  
60

1  
2  
3 434 The Ready, Willing and Able model posits that these three preconditions must be  
4  
5 435 satisfied before a decision aid will be adopted.<sup>38</sup> ‘Ready’ refers to the perceived benefit of  
6  
7  
8 436 changing the status quo and adopting an aid to support decision-making. ‘Willing’ refers  
9  
10 437 to the perceived legitimacy of a decision aid and a willingness to overcome objections  
11  
12 438 and concerns. ‘Able’ refers to the ability to adopt the decision aid given available  
13  
14 439 resources.<sup>39</sup> Implications for enhancing the readiness, willingness and ability of  
15  
16  
17 440 Australian Orthopaedic Surgeons to uptake a TKA decision aid are described below.  
18  
19

20 441

21  
22 442 To enhance Readiness to uptake, current decision-making biases may need to be  
23  
24 443 addressed. Information to counter these biases could be provided through audit and  
25  
26 444 feedback. Audit and feedback is defined as a ‘summary of the clinical performance of  
27  
28 445 healthcare provider(s) over a specified period of time’ (p. 5).<sup>40</sup> It may be particularly  
29  
30 446 effective when clinicians’ ability to accurately self-assess is limited.<sup>41</sup> This assumes that  
31  
32 447 clinicians are motivated to improve care but lack intention to change current behaviour  
33  
34 448 because they are unaware of their suboptimal performance. While effect sizes may  
35  
36 449 depend on the format and context in which feedback is provided, findings from a  
37  
38 450 Cochrane review suggest that audit and feedback can yield important improvements in  
39  
40 451 professional practice.<sup>40</sup> Clarity and consensus on the definition of ‘clinically meaningful  
41  
42 452 improvement’ and ‘non-response’ to TKA is likely to influence the success of an audit  
43  
44 453 and feedback intervention in this context. Future research is needed to explore how audit  
45  
46 454 and feedback is best delivered in this context including the immediacy and frequency of  
47  
48 455 feedback, and the potential to incorporate other approaches such as the use of surgeon  
49  
50 456 incentives.<sup>42</sup>  
51  
52  
53  
54  
55  
56  
57  
58  
59  
60

1  
2  
3 457

4  
5 458 To enhance Willingness to uptake, an audit and feedback intervention before and after  
6  
7  
8 459 using a decision aid may be necessary for Orthopaedic Surgeons to gain confidence in its  
9  
10 460 legitimacy. The findings suggest that validating a decision aid in large multi-centre trials  
11  
12 461 may not be sufficient to encourage uptake, as surgeons believed such trials do not  
13  
14 462 account for variations in case load and years of experience. Surgeons perceived  
15  
16 463 themselves as not only scientists, but also ‘artists’; believing that surgical success  
17  
18 464 depended, in part, on the ‘hands’ that performed it. This suggests that Orthopaedic  
19  
20 465 Surgeons may need to be given the opportunity to validate a decision aid ‘in their own  
21  
22 466 hands’.

23  
24  
25  
26  
27 467

28  
29 468 Addressing concerns about the medico-legal implications of a decision aid may also be  
30  
31 469 necessary to enhance Willingness to uptake. This may require the consultation of  
32  
33 470 multiple stakeholders including policy makers, lawyers and institutional administration  
34  
35 471 before the implementation of a decision aid. Legislative changes in the United States  
36  
37 472 have recognised decision aids as a higher standard of informed consent<sup>8</sup> and in the United  
38  
39 473 Kingdom, incentives to use decision aids are being developed.<sup>9</sup> There is evidence that  
40  
41 474 mandating the use of a decision aid as a requirement for gaining informed consent results  
42  
43 475 in significantly improved patient-outcomes including a reduction in the rate of TKA by  
44  
45 476 38 per cent in a six-month period.<sup>43</sup> Future studies are required to explore if policy  
46  
47 477 changes and/or incentives might influence Willingness to uptake a decisions aid in the  
48  
49 478 Australian context.

50  
51  
52  
53  
54  
55 479  
56  
57  
58  
59  
60

1  
2  
3 480 To enhance Ability to uptake, it appears important to address the dearth of non-operative  
4  
5 481 alternatives to surgery for end-stage knee OA so that surgeons have the resources to carry  
6  
7 482 out decisions. Future research to design and implement effective, evidence-based, non-  
8  
9 483 operative interventions should be a priority. Targeting Orthopaedic Surgeons' beliefs  
10  
11 484 about the efficacy of such interventions through education strategies will also be  
12  
13 485 important. The study findings suggest that Ability to uptake may be enhanced if a  
14  
15 486 decision aid is packaged in an electronic or online format that is quick and easily  
16  
17 487 accessible. Focus groups involving surgeons and patients to gain feedback on prototypes  
18  
19 488 of a decision aid during the design phase is important to ensure that not only the format,  
20  
21 489 but also content, are accessible to a range of end users.  
22  
23  
24  
25  
26

27 490

### 29 491 **Limitations**

30  
31 492 Qualitative studies involving Orthopaedic Surgeons are rare. The strength of this study  
32  
33 493 is the 100% participation rate by Orthopaedic Surgeons in one tertiary hospital  
34  
35 494 setting. While the sampling strategy means the generalizability of these findings to  
36  
37 495 other contexts may be limited, we have documented significant similarities with  
38  
39 496 international studies. We acknowledge that while beliefs, attitudes and intentions  
40  
41 497 can predict behaviors with a degree of accuracy, they are distinct from actual  
42  
43 498 behavior<sup>44</sup>. Thus the themes elicited in this study do not provide evidence of the  
44  
45 499 actual influences on uptake of a decision aid.  
46  
47  
48  
49

50 500

### 53 501 **Conclusions**

54 502

55

56

57

58

59

60



1  
2  
3 503 Using a theoretical framework to systematically explore barriers and facilitators to  
4  
5 504 uptake, this study will inform the design and implementation of future TKA decision  
6  
7  
8 505 aids.<sup>13</sup> The findings suggest that a multifaceted approach will be required to ensure that  
9  
10 506 Orthopaedic Surgeons are ready, willing and able to use a decision aid that can reduce the  
11  
12 507 suffering and economic burden of ‘failed’ TKA. Research exploring patients’ beliefs and  
13  
14 508 attitudes towards a TKA decision aid is required prior to implementation.  
15  
16  
17  
18 509

### 510 **Abbreviations**

511 TKA = Total Knee Arthroplasty

512 OA = Osteoarthritis

513 TDF = Theoretical Domains Framework

514

### 515 **Declarations**

516 **Ethics approval:** This study was carried out in compliance with the Helsinki  
517 Declaration. Approval was given by St Vincent’s Hospital Melbourne, Australia (QA 019  
518 /\_16).

519 **Availability of data and materials:** Requests regarding the datasets used in this study  
520 can be directed to the first author. Full interview transcripts will not be shared to protect  
521 the anonymity of the study participants.

522 **Competing interests:** The authors declare that they have no competing interests

523 **Funding:** This project was supported by a University of Melbourne FBE/MDHS  
524 Collaborative Research Seed-Funding Grant (2015).

1  
2  
3 525 **Authors contributions:** SB: led the study design, data collection, data analysis and  
4  
5 526 manuscript preparation. EN contributed to the data analysis. AS, PC and MD contributed  
6  
7 527 to the study design, data analysis and manuscript preparation. SF contributed to the study  
8  
9 528 design and manuscript preparation.

10  
11 529 **Acknowledgements:** We acknowledge Pascal Buenzli for assistance with the data  
12  
13 530 management software and inter-rater reliability calculation. We extend our thanks to all  
14  
15 531 the surgeons for kindly donating their time to participate in this study.  
16  
17  
18  
19

20 532

21 533

22 534 **References:**

23 535

24 536 1. Cobos R, Lattore A. Variability of indication criteria in knee and hip replacement:

25 537 An observational study. *BMC Musculoskeletal Disorders* 2010;11(249)

26 538 2. Dowsey M, Smith A, Choong P. Latent Class Growth Analysis predicts long term

27 539 pain and function trajectories in total knee arthroplasty: a study of 689

28 540 patients. *Osteoarthritis and Cartilage* 2015;23(12):2141-49.

29 541 3. Australian Orthopaedic Association, . Annual Report. Adelaide: National Joint

30 542 Replacement Registry, 2014.

31 543 4. Riddle DL, Jiranek WA, Hayes CW. Use of a validated algorithm to judge the

32 544 appropriateness of total knee arthroplasty in the United States: a multicenter

33 545 longitudinal cohort study. *Arthritis & rheumatology* 2014;66(8):2134-43. doi:

34 546 10.1002/art.38685

35 547 5. Curtis AJ, Wolfe R, Russell COH, et al. Determining priority for joint replacement:

36 548 comparing the views of orthopaedic surgeons and other professionals. *The*

37 549 *Medical Journal of Australia* 2011;195(11):699-702. doi:

38 550 10.5694/mja10.11052

39 551 6. Frankel L, Sanmartin C, Hawker G, et al. Perspectives of orthopaedic surgeons on

40 552 patients' appropriateness for total joint arthroplasty: a qualitative study.

41 553 *Journal of evaluation in clinical practice* 2016;22(2):164-70. doi:

42 554 10.1111/jep.12449

43 555 7. Gooberman-Hill R, Sansom A, Sanders C, et al. Unstated factors in orthopaedic

44 556 decision-making: A qualitative study. *BMC Musculoskeletal Disorders*

45 557 2010;11(213)

46 558 8. Kuehn B. States explore shared decision making. *JAMA* 2009;301(24):2539-41.

47 559 9. Jayadev C, Khan T, Coulter A, et al. Patient decision aids in knee replacement

48 560 surgery. *Knee* 2012;19(6):746.

49 561 10. Van den Bart B, Zwikker H, van den Ende C. Medication adherence in patients

50 562 with rheumatoid arthritis: a critical appraisal of the existing literature. *Expert*

51 563 *Reviews in Clinical Immunology* 2012;8:337-51.

- 1  
2  
3 564 11. Feldman-Stewart D, Brennenstuhl S, McIssac K, et al. A systematic review of  
4 565 information in decision aids. *Health Expectations* 2007;10(1):46-61.
- 5 566 12. Sacks GD, Dawes AJ, Ettner SL, et al. Impact of a Risk Calculator on Risk  
6 567 Perception and Surgical Decision Making: A Randomized Trial. *Annals of*  
7 568 *surgery* 2016 doi: 10.1097/SLA.0000000000001750
- 8 569 13. Dowsey M, Spelman T, Choong P. Development of a prognostic nomogram for  
9 570 predicting the probability of nonresponse to total knee arthroplasty 1 year  
10 571 after surgery. *Journal of Arthroplasty* 2016;In press
- 11 572 14. Barsoum W, Murray T, Klika A, et al. Predicting patient discharge disposition  
12 573 after total joint arthroplasty in the United States. *Journal of Arthroplasty*  
13 574 2010;25(6):885-92.
- 14 575 15. Kattan M. Nomograms are difficult to beat. *European Urology* 2008;53(4):671.
- 15 576 16. Stacey D, Bennett C, Barry M, et al. Decision aids for people facing health  
16 577 treatment or screening decisions. *Cochrane Database of Systematic Reviews*  
17 578 2011(10):CD001431.
- 18 579 17. Knops AM, Legemate DA, Goossens A, et al. Decision aids for patients facing a  
19 580 surgical treatment decision: a systematic review and meta-analysis. *Annals of*  
20 581 *surgery* 2013;257(5):860-6. doi: 10.1097/SLA.0b013e3182864fd6
- 21 582 18. Adam J, Khaw F, Thomson R, et al. Patient decision aids in joint replacement  
22 583 surgery: A literature review and an opinion survey of consultant orthopaedic  
23 584 surgeons. *Annals of the Royal College of Surgeons of England* 2008;90(3):198-  
24 585 207.
- 25 586 19. Phillips C, Marshall A, Chaves N, et al. Experiences of using the Theoretical  
26 587 Domains Framework across diverse clinical environments: A qualitative  
27 588 study. *Journal of Multidisciplinary Healthcare* 2015;8:139-46. doi:  
28 589 10.2147/JMDH.S78458
- 29 590 20. Eccles M, Grimshaw J, Walker A, et al. Changing the behaviour of healthcare  
30 591 professionals: the use of theory in promoting the uptake of research findings.  
31 592 *Journal of Clinical Epidemiology* 2005;58:107-12.
- 32 593 21. Noar S, Zimmerman R. Health behaviour theory and cumulative knowledge  
33 594 regarding health behaviours: Are we moving in the right direction? *Health*  
34 595 *Education Research* 2005;20(3):275-90.
- 35 596 22. Cane J, O'Connor D, Michie S. Validation of the theoretical domains framework  
36 597 for use in behaviour change and implementation research *Implementation*  
37 598 *Science* 2012;7(37)
- 38 599 23. Sansom A, Donovan J, Sanders C, et al. Routes to total joint replacement surgery:  
39 600 patients' and clinicians' perceptions of need. *Arthritis Care and Research*  
40 601 2010;62(9):1252-57.
- 41 602 24. Michie S, Johnston M, Abraham C, et al. Making psychological theory useful for  
42 603 implementing evidence based practice: A consensus approach. *Qualitative*  
43 604 *and Safety in Health Care* 2005;14:26-33. doi: 10.1136/qshc.2004.011155
- 44 605 25. Dobson F, Bennell K, French S, et al. Barriers and facilitators to exercise  
45 606 participation in people with hip and/or knee osteoarthritis. *American Journal*  
46 607 *of Physical Medicine and Rehabilitation* 2016;95(5):372-89.
- 47 608 26. French S, Green S, O'Connor D, et al. Developing theory-informed behaviour  
48 609 change interventions to implement evidence into practice: A systematic

- 1  
2  
3 610 approach using the Theoretical Domains Framework. *Implementation Science*  
4 611 2012;7(38)
- 5  
6 612 27. Patey A, Islam R, Francis J, et al. Anaesthesiologists' and surgeons' perceptions  
7 613 about routine pre-operative testing in low risk patients: application of the  
8 614 Theoretical Domains Framework to identify factors that influence physicians'  
9 615 decisions to order pre-operative tests. *Implementation Science* 2012;7(52)
- 10 616 28. Sepucha KR, Mulley AG. Extending decision support: preparation and  
11 617 implementation. *Patient Education and Counseling* 2003;50(3):269-71. doi:  
12 618 10.1016/s0738-3991(03)00048-x
- 13 619 29. Buenzli P. Codesort software, 2012.
- 14 620 30. Sacks GD, Dawes AJ, Ettner SL, et al. Surgeon Perception of Risk and Benefit in  
15 621 the Decision to Operate. *Annals of surgery* 2016 doi:  
16 622 10.1097/SLA.0000000000001784
- 17 623 31. Hawker G, Bohm ER, Conner-Spady B, et al. Perspectives of Canadian  
18 624 Stakeholders on Criteria for Appropriateness for Total Joint Arthroplasty in  
19 625 Patients With Hip and Knee Osteoarthritis. *Arthritis & rheumatology*  
20 626 2015;67(7):1806-15. doi: 10.1002/art.39124
- 21 627 32. Teunis T, Janssen S, Guitton TG, et al. Do Orthopaedic Surgeons Acknowledge  
22 628 Uncertainty? *Clinical orthopaedics and related research* 2016;474(6):1360-9.  
23 629 doi: 10.1007/s11999-015-4623-0
- 24 630 33. Kahneman D. Thinking, fast and slow. New York, USA: Macmillan 2011.
- 25 631 34. Hofestede S, Marang-van de Mheen P, Vliet Vlieland T, et al. Barriers and  
26 632 facilitators associated with non-surgical treatment use for osteoarthritis  
27 633 patients in orthopaedic practice. *PLoS One* 2016 doi:  
28 634 DOI:10.1371/journal.pone.0147406
- 29 635 35. Elwyn G, Rix A, Holt T, et al. Why do clinicians not refer patients to online  
30 636 decision support tools? Interviews with front line clinics in the NHS. *BMJ*  
31 637 *open* 2012;2(6) doi: 10.1136/bmjopen-2012-001530
- 32 638 36. Tai-Seale M, Elwyn G, Wilson CJ, et al. Enhancing Shared Decision Making  
33 639 Through Carefully Designed Interventions That Target Patient And Provider  
34 640 Behavior. *Health affairs* 2016;35(4):605-12. doi: 10.1377/hlthaff.2015.1398
- 35 641 37. Weinstein JN, Clay C, Morgan T. Informed patient choice: patient centred valuing  
36 642 of surgical risks and benefits. *Health affairs* 2007;26(3):726-30.
- 37 643 38. Lesthaeghe R, Vanderhoeft C. Ready, willing and able: A conceptualization of  
38 644 transitions to new behavioral forms. In: Casterline J, ed. Diffusion processes  
39 645 and fertility transition: selected perspectives. Washington DC: National  
40 646 Academies Press 2001:240-64.
- 41 647 39. Shultz C, Jimbo M. Decision aid use in primary care: An overview and theory-  
42 648 based framework. *Family Medicine* 2015;47(9):679-92.
- 43 649 40. Ivers N, Jamtvedt G, Flottorp S, et al. Audit and feedback: effects on professional  
44 650 practice and healthcare outcomes (Review). *Cochrane Database of Systematic*  
45 651 *Reviews* 2012(6):CD000259.
- 46 652 41. Davis D, Mazmanian P, Fordis M, et al. Accuracy of physician self-assessment  
47 653 compared with observed measures of competence: a systematic review.  
48 654 *JAMA* 2006;296(9):1094-102.

- 1  
2  
3 655 42. Emanuel E, Ubel P, Kessler H, et al. Using behavioural economics to design  
4 656 physician incentives that deliver high-value care. *Annals of Internal Medicine*  
5 657 2016;164:114-19.  
6  
7 658 43. Arterburn D, Wellman R, Westbrook E, et al. Introducing decision aids at Group  
8 659 Health was linked to sharply lower hip and knee surgery rates and costs.  
9 660 *Health affairs* 2012;31(9):2094-104. doi: 10.1377/hlthaff.2011.0686  
10 661 44. Azjen I, Madden T. Prediction of goal-directed behaviour: Attitudes, intentions  
11 662 and perceived behavioural control. *Journal of Experimental Social Psychology*  
12 663 1986;22:453-74.  
13  
14  
15 664  
16  
17  
18  
19  
20  
21  
22  
23  
24  
25  
26  
27  
28  
29  
30  
31  
32  
33  
34  
35  
36  
37  
38  
39  
40  
41  
42  
43  
44  
45  
46  
47  
48  
49  
50  
51  
52  
53  
54  
55  
56  
57  
58  
59  
60

Table 1. Interview Schedule

| TDF domain                 | Questions                                                                                                                                                                                                                                                                                                                                                                                                                                                                                                                                                                                                                                                                                                                                                                                                                  |
|----------------------------|----------------------------------------------------------------------------------------------------------------------------------------------------------------------------------------------------------------------------------------------------------------------------------------------------------------------------------------------------------------------------------------------------------------------------------------------------------------------------------------------------------------------------------------------------------------------------------------------------------------------------------------------------------------------------------------------------------------------------------------------------------------------------------------------------------------------------|
| Knowledge                  | <p><i>Evidence from the literature suggests that up to 22 per cent of patients presenting for total knee arthroplasty will not have a clinically meaningful improvement from surgery.</i></p> <ul style="list-style-type: none"> <li>- What do you think about this figure?</li> <li>-How do you interpret the term ‘no clinically meaningful improvement’?</li> </ul> <p><i>For the purposes of this interview, we are interpreting clinically meaningful improvement as no improvement in pain, function or QOL following surgery.</i></p> <ul style="list-style-type: none"> <li>- Are you aware of what percentage of patients that you operate on do not benefit from surgery? How do you know this? Do you track it? Would you like to know? How could feed this information back to you? In what format?</li> </ul> |
| Beliefs about capabilities | <ul style="list-style-type: none"> <li>- How confident are you in identifying patients who are unlikely to experience an improvement in symptoms from TKA?</li> <li>- How good do you think you are at it compared to others?</li> <li>- Do you feel you are unsure about identifying these patients at times? If so, what would you do?</li> </ul>                                                                                                                                                                                                                                                                                                                                                                                                                                                                        |
| Behavioural regulation     | <ul style="list-style-type: none"> <li>- Of all the patients referred to you, what is the % of patients that proceed to surgery and how many do you turn away?</li> <li>- What do you do with the ones that don't? Do you refer them somewhere?</li> </ul>                                                                                                                                                                                                                                                                                                                                                                                                                                                                                                                                                                 |
| Skills                     | <ul style="list-style-type: none"> <li>- What skills help you decide if someone is likely to benefit from surgery or not?</li> <li>- Are you aware of any tools currently available to help you assess a patients' risk of not responding? Do you use them? Why/ why not?</li> </ul>                                                                                                                                                                                                                                                                                                                                                                                                                                                                                                                                       |
| Beliefs about consequences | <p><i>Based on a set of evidence-based parameters, decision aids can predict the degree of risk that a patient will not achieve a clinically meaningful improvement from TKA</i></p> <ul style="list-style-type: none"> <li>-What do you think the benefits of using a decision aid might be?</li> <li>-What might be the disadvantages of using an aid?</li> <li>- Do you see anything legal or ethical about using a decision aid?</li> <li>-Would the benefits outweigh the potential harms? Why?</li> </ul>                                                                                                                                                                                                                                                                                                            |
| Intentions, Goal           | <ul style="list-style-type: none"> <li>-Would using a decision aid influence your surgical decision making? Why/why not?</li> </ul>                                                                                                                                                                                                                                                                                                                                                                                                                                                                                                                                                                                                                                                                                        |

|                                       |                                                                                                                                                                                                                                                                                                                   |
|---------------------------------------|-------------------------------------------------------------------------------------------------------------------------------------------------------------------------------------------------------------------------------------------------------------------------------------------------------------------|
| Reinforcement                         | -What would motivate you to use a decision aid?<br>-Would you need to be presented with evidence from the literature? How would this evidence be best delivered? Who would it need to be delivered by?                                                                                                            |
| Environmental context and resources   | -What would facilitate the use of a decision aid for you?<br>-How would it best be packaged?<br>-When do you think it would be best used? Do you think you are the best person to use it?                                                                                                                         |
| Decision process                      | -If a decision aid predicted that patient had a 50 per cent risk of not benefiting from surgery would you still operate? What about a 70 per cent risk? What would your level of acceptable risk be?                                                                                                              |
| Social/Professional role and identity | -Do you think there would be agreement between surgeons on this cut point?                                                                                                                                                                                                                                        |
| Social/Emotional influences           | -What if something like this tool became compulsory – how would you feel? How do you think other surgeons would feel?<br>-How do you think patients would respond? Would their response influence your use of an aid?<br>-Would you worry about missing potential candidates who might have responded to surgery? |
| Optimism                              | -How optimistic are you that a decision aid will reduce the rate of surgery in patients who are at high risk of not benefiting from surgery?                                                                                                                                                                      |

Table 2. Findings summary

| Relevant TDF Domains   | Specific Belief                                                                            | Facilitator or barrier | Example quote (participant code)                                                                                                                                                                                                                                                                                                                                                                                                                                                                        | Frequency out of 20 |
|------------------------|--------------------------------------------------------------------------------------------|------------------------|---------------------------------------------------------------------------------------------------------------------------------------------------------------------------------------------------------------------------------------------------------------------------------------------------------------------------------------------------------------------------------------------------------------------------------------------------------------------------------------------------------|---------------------|
| Knowledge              | I am aware of the literature that up to 20 per cent of patients do not have a CMI from TKA | Facilitator            | “I think 22 per cent is the high end. But there are a lot of different papers that all suggest 10,15,20 per cent” (012)                                                                                                                                                                                                                                                                                                                                                                                 | 19                  |
|                        | I think that this % is lower in my patients                                                | Barrier                | “I don’t count it, but I think around 10 per cent would be saying they aren’t entirely satisfied by surgery” (016)                                                                                                                                                                                                                                                                                                                                                                                      | 17                  |
|                        | Any improvement in pain is still an improvement, it depends how you define ‘meaningful’    | Barrier                | “If the surgery is done for the right reason, the pain would decrease, the question is whether the decrease would be 10, 50 or 100 per cent depending on whether there are other reasons for the pain. But there would be an improvement” (025)<br><br>“To me a good result is: they are going to have some intermittent ache in the knee, they’re not going to be able to kneel or squat. Others on some assessment scale might consider that a failure. So you have get those parameters right” (010) | 7                   |
| Behavioural regulation | I am aware that the feedback I get from my patients may be biased                          | Facilitator            | “To please you, patients often say it is doing better than it really is. So I would think my outcomes are better than 20 per cent, but I am aware of the glasses that I see it through as well as what patients might tell me” (014)                                                                                                                                                                                                                                                                    | 6                   |
|                        | I would be interested in                                                                   | Facilitator            | “There’s always a difference between how well you think you are doing and how you <i>are</i> doing. Having                                                                                                                                                                                                                                                                                                                                                                                              | 20                  |



|                                          |                                                                                           |             |                                                                                                                                                                                                                                                                                                                                                                                                                                                                                                                                                                                                                                                                                                  |    |
|------------------------------------------|-------------------------------------------------------------------------------------------|-------------|--------------------------------------------------------------------------------------------------------------------------------------------------------------------------------------------------------------------------------------------------------------------------------------------------------------------------------------------------------------------------------------------------------------------------------------------------------------------------------------------------------------------------------------------------------------------------------------------------------------------------------------------------------------------------------------------------|----|
|                                          | feedback on the percentage of my patients who achieve a clinically meaningful improvement |             | <p>formal feedback on patient outcomes gives you the opportunity to change things if you are not doing as well as you want to” (023)</p> <p>“What I would like to know is the patient who overall is unhappy with their results and didn’t get the result they expected” (010)</p> <p>“I would like feedback on the number of patients who are in each category of satisfaction and I would like to see how my personal results are compared to the group” (016)</p>                                                                                                                                                                                                                             |    |
| Memory, attention and decision processes | Patient expectations are an important consideration in surgical decision making           | Facilitator | “If the patients’ expectations are not meeting mine, I won’t do the operation because then the patient isn’t happy and sometimes they have 2/10 pain and they are not happy. And that is silly. So it is about telling the patient what they can expect and after the operation it is about ”you remember what we said” (013)                                                                                                                                                                                                                                                                                                                                                                    | 20 |
|                                          | The lack of effective non-operative alternatives influences my surgical decision making   | Barrier     | <p>“You have to be able to say ‘although we don’t think you would benefit from surgery, we’re going to put you in this intense physiotherapy program with dieticians to improve your knee pain. They need to be offered something. The problem is these things are available at an individual component level ... but I don’t think there is anything formally put in place that patients can be referred from arthroplasty clinics into these programs” (029)</p> <p>“Well if you make an alternative plan and say we are not going to do surgery we are going to lose weight, do some physiotherapy, take pain killers, you send them off and they come back and say they have done all of</p> | 12 |

|                            |                                                                                          |                                         |                                                                                                                                                                                                                                                                                                                                                                                                                                                                              |    |
|----------------------------|------------------------------------------------------------------------------------------|-----------------------------------------|------------------------------------------------------------------------------------------------------------------------------------------------------------------------------------------------------------------------------------------------------------------------------------------------------------------------------------------------------------------------------------------------------------------------------------------------------------------------------|----|
|                            |                                                                                          |                                         | <p>that. It means you don't have another option to offer them and those patients often just want an option and if there is an option you can give them it is easier to push them away from surgery" (016)</p> <p>"I think there are limitations on what you can improve with non-operative measures" (016)</p>                                                                                                                                                               |    |
|                            | My threshold of acceptable risk for surgery is >80% likelihood of good outcome           | Facilitator                             | "You have got to be 95 per cent and above. I wouldn't accept anything less than that. I wouldn't offer the operation. It is too big an operation, to bigger deal, too bigger cost" (024)                                                                                                                                                                                                                                                                                     | 8  |
|                            | My level of acceptable risk is patient dependent                                         | Facilitator (of shared decision making) | <p>"It is all about risk for reward. When you think about... the person is not unwell, they can safely have an anaesthetic, even risks as high as 50 per cent one in two that the patient will have no benefit, are worth considering...A patient may be so severely impacted that a 1 in 2 shot is worth it...it is totally patient dependent" (023)</p> <p>"I would rather a 10 per cent chance of getting better than sitting in a wheelchair in a lot of pain" (022)</p> | 11 |
| Beliefs about capabilities | I find it difficult to assess the patient-related factors that can influence TKA outcome | Facilitator                             | <p>"It is patient factors more than anything else. Because it is easy to look at xrays and say K-L, 1, 2, 3, 4 for disease severity. There's not much argument over that. It's about the patient factors, the psychology and behavioural aspects of it which you want reassurance for" (016)</p> <p>"Obviously I am not very good because 1 in 5 come back with a problem... so no I didn't know how to</p>                                                                  | 8  |

|                                       |                                                                          |             |                                                                                                                                                                                                                                                                                                                                                                                                                                                                              |    |
|---------------------------------------|--------------------------------------------------------------------------|-------------|------------------------------------------------------------------------------------------------------------------------------------------------------------------------------------------------------------------------------------------------------------------------------------------------------------------------------------------------------------------------------------------------------------------------------------------------------------------------------|----|
|                                       |                                                                          |             | identify them pre-operatively. Something is happening from my assessment to the patients' outcome and I don't know what the link is" (024)                                                                                                                                                                                                                                                                                                                                   |    |
|                                       | I am reasonably good at picking the patients who will do well            | Barrier     | "I think I am reasonably good... I do have a little bit of a gut feeling about patients" (013)                                                                                                                                                                                                                                                                                                                                                                               | 12 |
|                                       | It can be difficult to say no to patients                                | Facilitator | "Most of the time if we bring a patient to the case conference it is to get the support of everyone else to say no don't do it. Because if want to do the operation, you just go ahead and do it. If you don't want to do it and you want support that is when you take them along" (016)<br><br>"It is always easier to consent than decline" (025)                                                                                                                         | 5  |
| Skills                                | I mostly rely on my experience when it comes to surgical decision making | Barrier     | "You spend all your life looking at patients and assessing them and you start to develop a bit of a gut feeling as to what might be happening. Sometimes you sit in front a patient and think: I know you are telling me this, but I know something else is happening" (015)<br><br>"I don't use any formal tools. I use I guess old fashioned clinical acumen is what I would call it...I have been doing this for a while and you develop a way of assessing people" (028) | 10 |
| Social/professional role and identity | Surgery is an art and a science – it is not just about the evidence"     | Barrier     | "The human body is not a scientific machine. Medicine is an art and science and the art isn't always represented in the research" (028)<br><br>"I think that medicine is not about numbers, it is about patients. Each patient has their own different                                                                                                                                                                                                                       | 10 |

|                                          |                                                                                       |             |                                                                                                                                                                                                                                                                                                                                                                                                                                                                                                                                                                                                                                                                      |    |
|------------------------------------------|---------------------------------------------------------------------------------------|-------------|----------------------------------------------------------------------------------------------------------------------------------------------------------------------------------------------------------------------------------------------------------------------------------------------------------------------------------------------------------------------------------------------------------------------------------------------------------------------------------------------------------------------------------------------------------------------------------------------------------------------------------------------------------------------|----|
|                                          |                                                                                       |             | pathology and own different personality" (017)                                                                                                                                                                                                                                                                                                                                                                                                                                                                                                                                                                                                                       |    |
| Beliefs/attitudes towards a decision aid |                                                                                       |             |                                                                                                                                                                                                                                                                                                                                                                                                                                                                                                                                                                                                                                                                      |    |
| Intention                                | I would use a decision aid to support, not replace my decision-making                 | Facilitator | <p>"I don't think it would really influence my surgical decision making, I think it would more affirm my decision to not offer a patient an operation" (029)</p> <p>"If I think they are ok and they score badly I will relook at it and say why is that? Am I missing something obvious? But at the end of the day if an aid says one thing and my sniff test says there is something not right, I'm still following my nose" (010)</p>                                                                                                                                                                                                                             | 16 |
| Beliefs about consequences               | I think a decision aid would be a useful objective tool to help me say no to patients | Facilitator | <p>"It would be clinically helpful in the patient cohort who we don't think will do well from surgery, giving us an evidenced based approach for saying this is the reasons why we don't think you will benefit from surgery" (029)</p> <p>"I think that the main benefit of an aid would be making the patient understand if I am saying no to the surgery it's not because I don't like him or her, it is because there is data written black on white that they are not going to do well. ..It will not just be my gut feeling. I can give them data and say "sorry it is written here. It's not me it's the computer. So it backs up what I am saying" (013)</p> | 9  |
|                                          | I think an aid would be useful for gaining patient informed consent                   | Facilitator | "I think that is one of the important things about a decision aid and part of the consent process is that they know what to expect and it is still the patients decision to decide if they want to have surgery or not, but they                                                                                                                                                                                                                                                                                                                                                                                                                                     | 10 |

1  
2  
3  
4  
5  
6  
7  
8  
9  
10  
11  
12  
13  
14  
15  
16  
17  
18  
19  
20  
21  
22  
23  
24  
25  
26  
27  
28  
29  
30  
31  
32  
33  
34  
35  
36  
37  
38  
39  
40  
41  
42  
43  
44  
45  
46  
47  
48  
49

|  |                                                                                                                                             |             |                                                                                                                                                                                                                                                                                                                                                                                                                                                                                                                 |    |
|--|---------------------------------------------------------------------------------------------------------------------------------------------|-------------|-----------------------------------------------------------------------------------------------------------------------------------------------------------------------------------------------------------------------------------------------------------------------------------------------------------------------------------------------------------------------------------------------------------------------------------------------------------------------------------------------------------------|----|
|  | and shared decision making                                                                                                                  |             | <p>have to be appropriately informed and have the appropriate expectations to weigh up the risk and benefit” (019)</p> <p>“It comes back down to getting patient consent, as part of that I would incorporate it into my consent form and say preoperatively you have a 50:50 chance and that has been discussed with a validated tool” (021)</p>                                                                                                                                                               |    |
|  | I think a decision aid has the potential to improve the use of resources and save costs                                                     | Facilitator | “If you could use a decision aid to triage patients and push them somewhere else, it would be more effective for the patient and there would be cost savings for the hospital and the community” (016)                                                                                                                                                                                                                                                                                                          | 7  |
|  | A disadvantage of a decision aid is that it may not capture the nuances of the individual patient and some patients may miss out on surgery | Barrier     | “There are always reasons why people will fall on one side of the line or the other and the data will show that the tool might predict you will do really well but you happen to fall in that small group who are set to do really well but don’t, similarly the tool might say you will do really badly we better not operate on you but someone took the punt and you turned out really well so there are always those smaller groups and at times it is possible for the tool to miss certain nuances” (015) | 13 |
|  | I have concerns about the legal/ethical implications of a decision aid                                                                      | Barrier     | <p>“You have to think of the medico-legal implications of a patient having a risk value documented in their notes. If they don’t have a good result and then lawyers look through and say you had this validated tool and you still went ahead, where would we lie medico-legally?” (024)</p> <p>“I guess the ethicists would say you are denying patient-centred care, so that is where there is a potential for a can of worms” (021)</p>                                                                     | 8  |

|                                                                         |                                                                              |             |                                                                                                                                                                                                                                                                                                                                                                                                                                                                                                                                                                                                                                                                                                                                                                                          |    |
|-------------------------------------------------------------------------|------------------------------------------------------------------------------|-------------|------------------------------------------------------------------------------------------------------------------------------------------------------------------------------------------------------------------------------------------------------------------------------------------------------------------------------------------------------------------------------------------------------------------------------------------------------------------------------------------------------------------------------------------------------------------------------------------------------------------------------------------------------------------------------------------------------------------------------------------------------------------------------------------|----|
| Environmental context and resources (how the tool might be implemented) | I would not like to see a decision aid with mandatory cut-offs implemented   | -*          | <p>“I don’t think there are things that can become compulsory in terms of a decision aid as I mentioned because it takes away patient-centred care” (025)</p> <p>“No you can’t make anything compulsory like that. Not in medicine. Medicine is not black and white, it is grey, you can never make anything compulsory because a surgeon will operate according to their experience” (024)</p> <p>“Surgeons wouldn’t care if it was compulsory to use an aid, as long as they didn’t have to do any work. Making it compulsory to follow it would be dangerous. Because we’re all individuals, what you are doing is taking the human experience aspect of the consultation out and then you turn us into proceduralists that just look at a tick box and operate on someone” (016)</p> | 17 |
|                                                                         | I don’t think surgeons could ever agree on a cut-off level on a decision aid | -*          | <p>“A lot of surgeons would say in their hands they will get better results, that is just an inherent bias associated with surgical procedures and surgeons themselves so it would be hard to agree on a level” (019)</p> <p>“Unless you can clearly demonstrate a certain cut-off does better, so until there is almost black and white there will be some shades of grey and surgeons will differ in those shades of grey. And even if there is evidence you will still get surgeons that will reject it. That is just my feeling” (021)</p>                                                                                                                                                                                                                                           | 17 |
|                                                                         | I could see an electronic or online                                          | Facilitator | “I can imagine something working on the phone, just an app. Simple and intuitive so you put in a little info -                                                                                                                                                                                                                                                                                                                                                                                                                                                                                                                                                                                                                                                                           | 6  |

1  
2  
3  
4  
5  
6  
7  
8  
9  
10  
11  
12  
13  
14  
15  
16  
17  
18  
19  
20  
21  
22  
23  
24  
25  
26  
27  
28  
29  
30  
31  
32  
33  
34  
35  
36  
37  
38  
39  
40  
41  
42  
43  
44  
45  
46  
47  
48  
49

|               |                                                                                                                                                 |         |                                                                                                                                                                                                                                                                                                                                                                                                                                                                                                                                                                                                                                                                                                 |   |
|---------------|-------------------------------------------------------------------------------------------------------------------------------------------------|---------|-------------------------------------------------------------------------------------------------------------------------------------------------------------------------------------------------------------------------------------------------------------------------------------------------------------------------------------------------------------------------------------------------------------------------------------------------------------------------------------------------------------------------------------------------------------------------------------------------------------------------------------------------------------------------------------------------|---|
|               | tool working well in my practice                                                                                                                |         | BMI, age, degree of arthritis etc.. tick tick tick. And then it gives you the number, bang.” (013)<br><br>“A lot of patients look on my website. You could have a thing on your website saying: ‘sometimes patients with certain problems may not be appropriate for a TKA, this test can give you a rough idea of your likely success rate’. You could put it out there before they even come to see you. ‘Is this operation for you?’ type of thing” (028)                                                                                                                                                                                                                                    |   |
|               | Time would be a key concern to using a decision aid in my practice                                                                              | Barrier | “I just couldn’t use a tool that is going to take up more time. There is already so much demands on our time and there is not enough time as it is. So the tool may only take 5 minutes but then you add 4, 5, 6 patients and that is half an hour extra of your time that you didn’t have” (022)<br><br>“It is frantic getting patients through and there is always that rush to see all the patients in a really short time and to spend 5-10 minutes to do a questionnaire with a patient... it is hard to justify that. But if there was something validated and it was done as a routine process, the patient came in with a form filled out with a score that would be really nice” (016) | 6 |
| Reinforcement | Evidence that tool had been widely validated would not convince me to use it. I would need to correlate it with my own clinical decision making | -*      | “I never trust evidence because you only have to go to Dr x ...even in research, there is a lot of doubtful stuff. You’ve got to be careful about basing something totally on results. I know we have got to be evidenced-based but the evidence may apply to a certain situation in a certain individual at a period in time and there is always variations or exceptions around that. So I would try and correlate them in my own mind and if                                                                                                                                                                                                                                                 | 9 |

|       |                                                                              |             |                                                                                                                                                                                                                                                                                                                                                                                                                                                                                                                                                                         |    |
|-------|------------------------------------------------------------------------------|-------------|-------------------------------------------------------------------------------------------------------------------------------------------------------------------------------------------------------------------------------------------------------------------------------------------------------------------------------------------------------------------------------------------------------------------------------------------------------------------------------------------------------------------------------------------------------------------------|----|
|       |                                                                              |             | <p>after a while I am seeing well that person is a bit odd and they are scoring badly on the aid, well ok, this has legs.” (010)</p> <p>“I trust [the research] but I want my data no doubt about it because I think I am better... I know lots of faults in techniques or little things that really can comprise outcome. So everyone has a different hand and surgery is very touchy practice.... So I believe what happens around but at the same time I want mine as well because I know what I do differently or I am more careful about” (013)</p>                |    |
|       | I would be more likely to trust a tool developed and implemented by my peers | Facilitator | <p>“If a decision aid is implemented and I see my colleagues implementing it and it is working in their hands then possibly that would convince me” (024)</p> <p>“I think people are mistrustful of things that come out of other institutions but I would trust that a study from [the Department] would be a rigorous design. Where people are invested in something, they’re much more likely to use it. If the results showed an aid was valid, I guess I would be prepared to try it and see whether I thought it was valid in my hands, in my practice” (026)</p> | 4  |
| Goals | My goal is to optimise patient outcomes                                      | Facilitator | “Certainly, surgeons want results. If you say you are going to reduce our risk, then why wouldn’t we be happy with that” (012)                                                                                                                                                                                                                                                                                                                                                                                                                                          | 20 |

\* (-) denotes that the belief may be either a facilitator or barrier depending on how an aid is implemented



Table 3. Supporting extracts

| Quote number | Quote (Participant code)                                                                                                                                                                                                                                                                                                                                                                                                                                            |
|--------------|---------------------------------------------------------------------------------------------------------------------------------------------------------------------------------------------------------------------------------------------------------------------------------------------------------------------------------------------------------------------------------------------------------------------------------------------------------------------|
| Q1           | “Ultimately, we will always do our best for the patient” (024)                                                                                                                                                                                                                                                                                                                                                                                                      |
| Q2           | “I don’t count it, but you get an impression. Around 10 per cent of my patients would be saying they are not entirely satisfied by surgery” (016)                                                                                                                                                                                                                                                                                                                   |
| Q3           | “Often, to please you, patients say that it is doing better than it really is. So I would think my outcomes are better than 20 per cent, but I am aware of the glasses that I see it through as well as what patients might tell me” (014)                                                                                                                                                                                                                          |
| Q4           | “There’s always a difference between how well you are doing and how well you think you are doing. Having formal feedback on patient outcomes gives you the opportunity to change things if you are not doing as well as you want to” (023)                                                                                                                                                                                                                          |
| Q5           | “If patients choose not to come back, the only way you have got to track them is looking at your results from the registry. But I want to know the answers to the clinical questions – are you happy? Is your pain better than it was pre-op? How you ask the question matters” (028)                                                                                                                                                                               |
| Q6           | “If you received feedback that the rate of clinically meaningful improvement reported by your patients is not as high as you think it should be, you have to look at whether you are not picking the right patients, or you are operating on patients that are not going to do well. I think it would be more likely to be the way the question is asked. I would want to check who is asking the questions, what they are asking and how they are asking it” (023) |
| Q7           | “To me a good result is: they are going to have some intermittent ache in the knee, they are not going to be able to kneel or squat, they are going to be aware that it is there. That to me is a good result. Now others on some assessment scale they might say well that is in our system considered a failure thing, so you have get those parameters right” (010)                                                                                              |
| Q8           | “At the end of the day if there is a pathology that can be deleted by surgery and the patient accepts some improvement then that means that the surgery will happen” (025)                                                                                                                                                                                                                                                                                          |
| Q9           | “If the patients’ expectations are not meeting mine, I won’t do the operation because then the patient isn’t happy and sometimes they have 2/10 pain and they are not happy” (013)                                                                                                                                                                                                                                                                                  |
| Q10          | “It is patient factors more than anything else. Because it is very easy for me to look at xrays and use the Kellgren-Lawrence scale: 1, 2, 3, 4 for disease severity. There is not much of an argument over that. It is about the patient factors, the psychology and behavioural aspects of it which is more what you want reassurance for” (016)                                                                                                                  |
| Q11          | “You spend all your life looking at patients and assessing them and you start to develop a bit of a gut feeling as to what might be happening when you sit in front of a patient and you might be saying you know you are telling me this but actually I know something else is happening” (015)                                                                                                                                                                    |
| Q12          | “I don’t think it would really influence my surgical decision making, I think it would more affirm my decision to not offer                                                                                                                                                                                                                                                                                                                                         |

|     |                                                                                                                                                                                                                                                                                                                                                                                                                                                                                                                                                                                 |
|-----|---------------------------------------------------------------------------------------------------------------------------------------------------------------------------------------------------------------------------------------------------------------------------------------------------------------------------------------------------------------------------------------------------------------------------------------------------------------------------------------------------------------------------------------------------------------------------------|
|     | a patient an operation” (029)                                                                                                                                                                                                                                                                                                                                                                                                                                                                                                                                                   |
| Q13 | “If I think they are OK and they score badly I will relook at it and say why is that? Am I missing something obvious? But at the end of the day if the tool says one thing and my sniff test says there is something not right, I am still following my nose” (010)                                                                                                                                                                                                                                                                                                             |
| Q14 | “Not every tool is perfect and it may not capture every patient... the danger is we may end up refusing to do something because of this tool and therefore the patient may not receive the appropriate treatment based on a decision aid and nothing is 100% so you have to expect some patients would fall through the cracks” (019)                                                                                                                                                                                                                                           |
| Q15 | “I think people are mistrustful of things that come out of other institutions but I would trust that a study from [the Department] would be a rigorous design. Where people are invested in something, they are much more likely to use it. If the results showed the tool was valid, I guess I would be prepared to try it and see whether I thought it was valid in my hands, in my practice” (026)                                                                                                                                                                           |
| Q16 | “I never trust evidence because you only have to go to Dr x ...even in research, there is a lot of doubtful stuff and you have got to be careful about basing something totally on results. I know we have got to be evidenced based but the evidence may apply to a certain situation in a certain individual at a period in time and there is always variations or exceptions around that. So I would try and correlate them in my own mind and if after a while I am seeing well that person is a bit odd and they are scoring badly on that, well ok, this has legs.” (010) |
| Q17 | “I think that the main benefit of a tool would be making the patient understand if I am saying no to the surgery it is not because I don’t like him or her, it is because there is data written black on white that they are not going to do well...It will not just be my gut feeling. I can give them data and say ”sorry it is written here. It is not me it is the computer. So it backs up what I am saying” (013)                                                                                                                                                         |
| Q18 | “It comes back down to getting patient consent, as part of that I would incorporate it into my consent form and say preoperatively you have a 50:50 chance and that has been discussed with a validated tool. If the patient wishes to go ahead, they can make that informed decision” (021)                                                                                                                                                                                                                                                                                    |
| Q19 | “A patient may be so severely impacted that a 1 in 2 shot is worth it...it is totally patient dependent” (023)                                                                                                                                                                                                                                                                                                                                                                                                                                                                  |
| Q20 | “You have got to be 95% and above. I wouldn’t accept anything less than that. I wouldn’t offer the operation. It is too big an operation, too big a deal, too big a cost” (024)                                                                                                                                                                                                                                                                                                                                                                                                 |
| Q21 | “You have to think the medico-legal implications of a patient having a risk value documented in their notes. If they don’t have a good result and then some have the lawyers look through and say you had this tool that was validated and you still went ahead where would we lie medico-legally?” (024)                                                                                                                                                                                                                                                                       |
| Q22 | “I guess the ethicists would say you are denying patient-centred care, so that is where there is a potential for a can of worms” (021)                                                                                                                                                                                                                                                                                                                                                                                                                                          |
| Q23 | “I don’t think it can become compulsory because it takes away patient-centred care” (025)                                                                                                                                                                                                                                                                                                                                                                                                                                                                                       |

|     |                                                                                                                                                                                                                                                                                                                                                                                                                                                                                                                                                            |
|-----|------------------------------------------------------------------------------------------------------------------------------------------------------------------------------------------------------------------------------------------------------------------------------------------------------------------------------------------------------------------------------------------------------------------------------------------------------------------------------------------------------------------------------------------------------------|
| Q24 | “If you could use the tool to triage patients and push them some where else, it would be more effective for the patient and there would be cost savings for the hospital and the community” (016)                                                                                                                                                                                                                                                                                                                                                          |
| Q25 | “You have to be able to say: ‘although we don’t think you would benefit from surgery, we are going to put you in this intense physiotherapy program with dieticians and this is how we are going to improve your knee pain’. They need to be offered something. The problem is these things are available at an individual component level - we have got dieticians and physiotherapists and exercise groups, but I don’t think there is anything formally put in place that patients can be referred from arthroplasty clinics into these programs” (029) |
| Q26 | “A lot of surgeons would say in their hands they will get better results, that is just an inherent bias associated with surgical procedures and surgeons themselves so it would be hard to agree on a level” (019)                                                                                                                                                                                                                                                                                                                                         |
| Q27 | “Well compulsory to have it? Ok. That would be easy to do and surgeons wouldn’t care as long as they didn’t have to do any work. Making it compulsory to follow it would be dangerous. Because we are all individuals, what you are doing is taking the human experience aspect of the consultation out and then you turn us into proceduralists that just look at a tick box and operate on someone” (016)                                                                                                                                                |
| Q28 | “I can imagine something working on the phone, an app. It needs to be simple and intuitive - so you put in a little info - BMI, age, degree of arthritis etc,.. tick tick tick. And then it gives you the number, bang” (013)                                                                                                                                                                                                                                                                                                                              |
| Q29 | “I think it is something that should be done by the surgeon. It is also part of the process where the surgeon gets to know the patient as well - not just their xrays and physical examination but also their psychosocial situation” (019)                                                                                                                                                                                                                                                                                                                |
| Q30 | “I would want the tool to be applied within the consultation. Because I would never believe a value until I have seen the person. Because we might just have one of those weird situations that fall out of the ‘normal’ range.” (010)                                                                                                                                                                                                                                                                                                                     |
| Q31 | “When you have got 10 minutes for a consultation you don’t have time to spend another 10 minutes going through the tool. So it would have to be either the patient themselves or secretarial person prior to the consultation” (012)                                                                                                                                                                                                                                                                                                                       |
| Q32 | “I have a lot of patients look me up on my website. You could have a thing on your website saying: ‘sometimes patients with certain problems may not be appropriate for a TKA, this test can give you a rough idea of your success rate’. You could put it out there before they even come to see you. ‘Is this operation for you?’ type of thing” (028)                                                                                                                                                                                                   |

## Appendix 1. Theoretical Domains Framework definitions for coding

| TDF Domain                                     | Description                                                                                                                                                                                                                                                                                                                                                                                                                                                                     |
|------------------------------------------------|---------------------------------------------------------------------------------------------------------------------------------------------------------------------------------------------------------------------------------------------------------------------------------------------------------------------------------------------------------------------------------------------------------------------------------------------------------------------------------|
| Knowledge                                      | <p><i>An awareness of the existence of something</i></p> <ul style="list-style-type: none"> <li>- Awareness of scientific rationale regarding patients at risk of no clinically meaningful improvement from surgery</li> <li>- Awareness of own percentage of patients who don't respond</li> <li>- Awareness of decision aids to assist in identifying surgical candidates</li> </ul>                                                                                          |
| Skills                                         | <p><i>An ability or proficiency acquired through practice</i></p> <ul style="list-style-type: none"> <li>- Ability required/acquired through practice/experience to help decide if a patient is likely to benefit from surgery or not</li> <li>- Use of tool to assist in identifying suitable candidates for surgery</li> </ul>                                                                                                                                                |
| Social/<br>Professional<br>role/identity       | <p><i>A coherent set of behaviours and displayed personal qualities of an individual in a social or work setting</i></p> <ul style="list-style-type: none"> <li>- Surgeons' expressions about their own professional identity/job/role/professional boundaries when managing a person at high risk of no clinically meaningful improvement</li> </ul>                                                                                                                           |
| Beliefs about<br>capabilities                  | <p><i>Acceptance of the truth, reality or validity about an ability, talent or facility that a person can put to constructive use</i></p> <ul style="list-style-type: none"> <li>- The surgeon's confidence that they can identify patients at risk of no clinically meaningful improvement and can employ the skills needed to refuse to operate on the patients</li> </ul>                                                                                                    |
| Optimism                                       | <p><i>The confidence that things will happen for the best, of that desired goals will be attained</i></p> <ul style="list-style-type: none"> <li>- The confidence expressed that a decision aid will reduce the rate of surgery in patients at high risk of no clinically meaningful improvement</li> </ul>                                                                                                                                                                     |
| Beliefs about<br>consequences                  | <p><i>Acceptance of the truth, reality or validity about outcomes of a behaviour in a given situation</i></p> <ul style="list-style-type: none"> <li>- Perceptions about outcomes, advantages and disadvantages of using a decision aid</li> <li>- Any legal or ethical concerns about using a decision aid</li> </ul>                                                                                                                                                          |
| Reinforcement                                  | <p><i>Increasing the probability of a response by arranging a dependent relationship, or contingency, between the response and a given stimulus</i></p> <ul style="list-style-type: none"> <li>- What incentives would influence the surgeon using a decision aid</li> </ul>                                                                                                                                                                                                    |
| Intentions                                     | <p><i>A conscious decision to perform a behaviour or a resolve to act in a certain way</i></p> <ul style="list-style-type: none"> <li>- Intentions to use a decision aid</li> </ul>                                                                                                                                                                                                                                                                                             |
| Goals                                          | <p><i>Mental representation of outcomes or end states that an individual wants to achieve</i></p>                                                                                                                                                                                                                                                                                                                                                                               |
| Memory, attention<br>and decision<br>processes | <p><i>The ability to retain information, focus selectively on aspects of the environment and choose between two or more alternatives</i></p> <ul style="list-style-type: none"> <li>- The processes involved and factors taken into account when the surgeon makes decisions about whether to operate or not</li> <li>- If the surgeon surgical decision making will be influenced by the decision aid</li> <li>- Surgeon's perceptions of acceptable levels of risk</li> </ul> |
| Environmental<br>context and<br>resources      | <p><i>Any circumstance of a person's situation or environment that discourage or encourage the development of skills and abilities, independence, social competence and adaptive behaviour</i></p> <ul style="list-style-type: none"> <li>- Availability of, and confidence in, non-operative alternatives</li> </ul>                                                                                                                                                           |

|                        |                                                                                                                                                                                                                                                                                                                                                                                                                                   |
|------------------------|-----------------------------------------------------------------------------------------------------------------------------------------------------------------------------------------------------------------------------------------------------------------------------------------------------------------------------------------------------------------------------------------------------------------------------------|
|                        | <ul style="list-style-type: none"> <li>- Public versus private differences</li> <li>- How a decision aid might best be packaged/implemented</li> <li>- Attitudes towards mandating use of a decision aid</li> <li>- How surgeons can agree on level of acceptable risk with decision aid</li> </ul>                                                                                                                               |
| Social influences      | <p><i>Those interpersonal processes that can cause an individual to change their thoughts, feelings or behaviours</i></p> <ul style="list-style-type: none"> <li>- The influences that other surgeons have on surgeon decision to operate or not</li> <li>- The influences patients have on surgeon decision to operate or not</li> <li>- How the surgeon believes patients might respond to the use of a decision aid</li> </ul> |
| Emotion                | <p><i>A complex reaction pattern, involving experiential, behavioural and physiological elements, by which the individual attempts to deal with a personally significant matter or event</i></p> <ul style="list-style-type: none"> <li>- The emotional responses of the surgeon to using a decision aid</li> </ul>                                                                                                               |
| Behavioural regulation | <p><i>Anything aimed at managing or changing objectively observed or measured actions</i></p> <ul style="list-style-type: none"> <li>- Consistency of decisions to operate or not in patients at high risk of not responding</li> <li>- Processes that help regulate behaviour</li> </ul>                                                                                                                                         |

## SUPPLEMENT 1: COREQ 32-ITEM CHECKLIST

Tong A, Sainsbury P, Craig J. (2007) Consolidated criteria for reporting qualitative research (COREQ): a 32-item checklist for interviews and focus groups. *International Journal for Quality in Healthcare*: 19:349 – 357

| No. Item                                      | Guide questions/description                                              | Reported on Page # |
|-----------------------------------------------|--------------------------------------------------------------------------|--------------------|
| Domain 1: Research team and reflexivity       |                                                                          |                    |
| 1. Inter viewer/facilitator                   | Which author/s conducted the interview?                                  | 7                  |
| 2. Credentials                                | What were the researcher's credentials?                                  | 7                  |
| 3. Occupation                                 | What was their occupation at the time of the study?                      | 7                  |
| 4. Gender                                     | Was the researcher male or female?                                       | 7                  |
| 5. Experience and training                    | What experience or training did the researcher have?                     | 7                  |
| 6. Relationship with participants established | Was a relationship established prior to study commencement?              | 7                  |
| 7. Participant knowledge of the interviewer   | What did the participants know about the researcher?                     | 7                  |
| 8. Interviewer characteristics                | What characteristics were reported about the inter viewer/facilitator?   | 7                  |
| Domain 2: study design                        |                                                                          |                    |
| 9. Methodological orientation and Theory      | What methodological orientation was stated to underpin the study?        | 8                  |
| 10. Sampling                                  | How were participants selected?                                          | 6                  |
| 11. Method of approach                        | How were participants approached?                                        | 6                  |
| 12. Sample size                               | How many participants were in the study?                                 | 10                 |
| 13. Non-participation                         | How many people refused to participate or dropped out? Reasons?          | 10                 |
| 14. Setting of data collection                | Where was the data collected?                                            | 7                  |
| 15. Presence of non-participants              | Was anyone else present besides the participants and researchers?        | 7                  |
| 16. Description of sample                     | What are the important characteristics of the sample?                    | 10                 |
| 17. Interview guide                           | Were questions, prompts, guides provided by the authors?                 | Table 1            |
| 18. Repeat interviews                         | Were repeat interviews carried out?                                      | 7                  |
| 19. Audio/visual recording                    | Did the research use audio or visual recording to collect the data?      | 7                  |
| 20. Field notes                               | Were field notes made during and/or after the inter view?                | 7                  |
| 21. Duration                                  | What was the duration of the interviews                                  | 7                  |
| 22. Data saturation                           | Was data saturation discussed?                                           | 7                  |
| 23. Transcripts returned                      | Were transcripts returned to participants for comment and/or correction? | 8                  |
| Domain 3: analysis and findings               |                                                                          |                    |
| 24. Number of data coders                     | How many data coders coded the data?                                     | 8, 9               |
| 25. Description of the coding tree            | Did authors provide a description of the coding tree?                    | Additional file 1  |
| 26. Derivation of themes                      | Were themes identified in advance or derived from the data?              | 8, 9               |
| 27. Software                                  | What software, if applicable, was used to                                | 8                  |

|                                  |                                                                                                         |                        |
|----------------------------------|---------------------------------------------------------------------------------------------------------|------------------------|
|                                  | manage the data?                                                                                        |                        |
| 28. Participant checking         | Did participants provide feedback on the findings?                                                      | 8                      |
| 29. Quotations presented         | Were participant quotations presented to illustrate the themes/findings? Was each quotation identified? | Table 3                |
| 30. Data and findings consistent | Was there consistency between the data presented and the findings?                                      | 11-22 and Table 3      |
| 31. Clarity of major themes      | Were major themes clearly presented in the findings?                                                    | 11-22 and Table 3      |
| 32. Clarity of minor themes      | Is there a description of diverse cases or discussion of minor themes?                                  | 19, 22, 23 and Table 3 |
