# Supplementary material for: Barriers and facilitators to orthopaedic surgeons’ uptake of decision aids for total knee arthroplasty: a qualitative study
Source: PubMed Central journal article supplement — BMJ Open. 2017 Nov 12;7(11):e018614. doi: 10.1136/bmjopen-2017-018614 (PMC5695436; doi:10.1136/bmjopen-2017-018614), 2017-11-12
Supplement: bmjopen-2017-018614supp001.pdf [file bmjopen-2017-018614supp001.pdf]

Appendix 1. Theoretical Domains Framework definitions for coding

| TDF Domain                                     | Description                                                                                                                                                                                                                                                                                                                                                                                                                                                                     |
|------------------------------------------------|---------------------------------------------------------------------------------------------------------------------------------------------------------------------------------------------------------------------------------------------------------------------------------------------------------------------------------------------------------------------------------------------------------------------------------------------------------------------------------|
| Knowledge                                      | <p><i>An awareness of the existence of something</i></p> <ul style="list-style-type: none"> <li>- Awareness of scientific rationale regarding patients at risk of no clinically meaningful improvement from surgery</li> <li>- Awareness of own percentage of patients who don't respond</li> <li>- Awareness of decision aids to assist in identifying surgical candidates</li> </ul>                                                                                          |
| Skills                                         | <p><i>An ability or proficiency acquired through practice</i></p> <ul style="list-style-type: none"> <li>- Ability required/acquired through practice/experience to help decide if a patient is likely to benefit from surgery or not</li> <li>- Use of tool to assist in identifying suitable candidates for surgery</li> </ul>                                                                                                                                                |
| Social/<br>Professional<br>role/identity       | <p><i>A coherent set of behaviours and displayed personal qualities of an individual in a social or work setting</i></p> <ul style="list-style-type: none"> <li>- Surgeons' expressions about their own professional identity/job/role/professional boundaries when managing a person at high risk of no clinically meaningful improvement</li> </ul>                                                                                                                           |
| Beliefs about<br>capabilities                  | <p><i>Acceptance of the truth, reality or validity about an ability, talent or facility that a person can put to constructive use</i></p> <ul style="list-style-type: none"> <li>- The surgeon's confidence that they can identify patients at risk of no clinically meaningful improvement and can employ the skills needed to refuse to operate on the patients</li> </ul>                                                                                                    |
| Optimism                                       | <p><i>The confidence that things will happen for the best, of that desired goals will be attained</i></p> <ul style="list-style-type: none"> <li>- The confidence expressed that a decision aid will reduce the rate of surgery in patients at high risk of no clinically meaningful improvement</li> </ul>                                                                                                                                                                     |
| Beliefs about<br>consequences                  | <p><i>Acceptance of the truth, reality or validity about outcomes of a behaviour in a given situation</i></p> <ul style="list-style-type: none"> <li>- Perceptions about outcomes, advantages and disadvantages of using a decision aid</li> <li>- Any legal or ethical concerns about using a decision aid</li> </ul>                                                                                                                                                          |
| Reinforcement                                  | <p><i>Increasing the probability of a response by arranging a dependent relationship, or contingency, between the response and a given stimulus</i></p> <ul style="list-style-type: none"> <li>- What incentives would influence the surgeon using a decision aid</li> </ul>                                                                                                                                                                                                    |
| Intentions                                     | <p><i>A conscious decision to perform a behaviour or a resolve to act in a certain way</i></p> <ul style="list-style-type: none"> <li>- Intentions to use a decision aid</li> </ul>                                                                                                                                                                                                                                                                                             |
| Goals                                          | <p><i>Mental representation of outcomes or end states that an individual wants to achieve</i></p>                                                                                                                                                                                                                                                                                                                                                                               |
| Memory, attention<br>and decision<br>processes | <p><i>The ability to retain information, focus selectively on aspects of the environment and choose between two or more alternatives</i></p> <ul style="list-style-type: none"> <li>- The processes involved and factors taken into account when the surgeon makes decisions about whether to operate or not</li> <li>- If the surgeon surgical decision making will be influenced by the decision aid</li> <li>- Surgeon's perceptions of acceptable levels of risk</li> </ul> |
| Environmental<br>context and<br>resources      | <p><i>Any circumstance of a person's situation or environment that discourage or encourage the development of skills and abilities, independence, social competence and adaptive behaviour</i></p> <ul style="list-style-type: none"> <li>- Availability of, and confidence in, non-operative alternatives</li> </ul>                                                                                                                                                           |

|                        |                                                                                                                                                                                                                                                                                                                                                                                                                                   |
|------------------------|-----------------------------------------------------------------------------------------------------------------------------------------------------------------------------------------------------------------------------------------------------------------------------------------------------------------------------------------------------------------------------------------------------------------------------------|
|                        | <ul style="list-style-type: none"> <li>- Public versus private differences</li> <li>- How a decision aid might best be packaged/implemented</li> <li>- Attitudes towards mandating use of a decision aid</li> <li>- How surgeons can agree on level of acceptable risk with decision aid</li> </ul>                                                                                                                               |
| Social influences      | <p><i>Those interpersonal processes that can cause an individual to change their thoughts, feelings or behaviours</i></p> <ul style="list-style-type: none"> <li>- The influences that other surgeons have on surgeon decision to operate or not</li> <li>- The influences patients have on surgeon decision to operate or not</li> <li>- How the surgeon believes patients might respond to the use of a decision aid</li> </ul> |
| Emotion                | <p><i>A complex reaction pattern, involving experiential, behavioural and physiological elements, by which the individual attempts to deal with a personally significant matter or event</i></p> <ul style="list-style-type: none"> <li>- The emotional responses of the surgeon to using a decision aid</li> </ul>                                                                                                               |
| Behavioural regulation | <p><i>Anything aimed at managing or changing objectively observed or measured actions</i></p> <ul style="list-style-type: none"> <li>- Consistency of decisions to operate or not in patients at high risk of not responding</li> <li>- Processes that help regulate behaviour</li> </ul>                                                                                                                                         |
